# Supplementary material
Source: publisher figshare collection journal article supplement (https://acs.figshare.com/ndownloader/files/5706810)
Supplement: Supplementary file 1 [file 5706810]

ic970013m.cif

data_IC970013M_cif
_audit_creation_date        97-O5-20
_audit_creation_method      CRYSTALS
#  Inorg. Chem. IC970013M
# 1. SUBMISSION DETAILS
_publ_contact_author
;
 J.P. Launay, CEMES, BP4347, 29 Rue J. Marvig, 31055, Toulouse (Fr)             
            
;
_publ_contact_author_phone                      ' (33) 5 62 25 78 32 '
_publ_contact_author_fax                        ' (33) 5 62 25 79 99 '
_publ_contact_author_email                      ' launay@cemes.fr '
_publ_requested_journal                         'Inorganic Chemistry'
_publ_contact_letter
;
     Please consider this CIF submission for the paper IC970013M (compound 1o). 
     The figures have been sent by mail, and structure factor listings 
     can be made available if requested.
;
#=============================================================================
# 2. PROCESSING SUMMARY (IUCr Office Use Only)
_journal_date_recd_electronic     ?
_journal_date_to_coeditor         ?
_journal_date_from_coeditor       ?
_journal_date_accepted            ?
_journal_date_printers_first      ?
_journal_date_printers_final      ?
_journal_date_proofs_out          ?
_journal_date_proofs_in           ?
_journal_coeditor_name            ?
_journal_coeditor_code            ?
_journal_coeditor_notes
;
                                  ?
;
_journal_techeditor_code          ?
_journal_techeditor_notes
;
                                  ?
;
_journal_coden_ASTM               ?
_journal_name_full                ?
_journal_year                     ?
_journal_volume                   ?
_journal_issue                    ?
_journal_page_first               ?
_journal_page_last                ?
_journal_suppl_publ_number        ?
_journal_suppl_publ_pages         ?
#=============================================================================
# 3. TITLE AND AUTHOR LIST
_publ_section_title
;
 Topological Effects on Intramolecular Electron Transfer via "Quantum 
 Interference". Manuscript IC970013M. Compound 1o.
;
# The loop structure below should contain the names and addresses of all
# authors, in the required order of publication. Repeat as necessary.
loop_
        _publ_author_name
        _publ_author_address
'Patoux, Cendrine'                               
;
CEMES, BP4347, 29 Rue J. Marvig, 31055, Toulouse (Fr)                         
;
'Coudret, Christophe'
;
CEMES, BP4347, 29 Rue J. Marvig, 31055, Toulouse (Fr)                         
;
'Launay, Jean-Pierre'
;
CEMES, BP4347, 29 Rue J. Marvig, 31055, Toulouse (Fr)                         
;
'Joachim, Christian'
;
CEMES, BP4347, 29 Rue J. Marvig, 31055, Toulouse (Fr)                         
;
'Gourdon, Andre'
;
CEMES, BP4347, 29 Rue J. Marvig, 31055, Toulouse (Fr)                         
;
#==============================================================================
# 4. TEXT

_publ_section_references
;
 
Altomare, A., Cascarano, G., Giacovazzo G., Guagliardi A., Burla M.C.,
Polidori, G.  & Camalli, M. (1994) SIR92 - a program for automatic solution of
crystal structures by direct methods. J. Appl. Cryst. (27), 435
 
Carruthers, J.R. and Watkin, D.J. (1979), (Chebychev Weighting)
Acta Cryst, A35, 698-699
 
Walker, N., and Stuart, D. DIFABS. Acta Cryst, A39, 158-166
 
Watkin, D.J., Prout, C.K. Carruthers, R.J. & Betteridge, P. (1996) CRYSTALS
Issue 10. Chemical Crystallography Laboratory, OXFORD, UK.
 
Watkin, D.J., Prout, C.K. & Pearce, L.J. (1996) CAMERON, Chemical
Crystallography Laboratory, OXFORD, UK.
 
Watkin, D.J., Prout, C.K., Lilley, P.M.deQ. (1994), RC93, Chemical
Crystallography Laboratory, Oxford, UK.
;
#==========================================================================
# Now, all the structure specific goodies
#==========================================================================
_computing_data_collection 'CAD-4 software (Enraf-Nonius, 1989)'
_computing_cell_refinement 'CAD-4 software (Enraf-Nonius, 1989)'
_computing_data_reduction
;
RC93 (Watkin, D.J., Prout, C.K., Lilley, P.M.deQ. 1994)
;
_computing_structure_refinement
;
CRYSTALS Issue 10 (Watkin, Prout, Carruthers & Betteridge, 1996)
;
_computing_publication_material
;
CRYSTALS Issue 10 (Watkin, Prout, Carruthers & Betteridge, 1996)
;
_computing_molecular_graphics
;
 CAMERON (Watkin, Prout & Pearce,  1996)
;
_computing_structure_solution 'SIR92 (Giacovazzo et al, 1992)'
_cell_length_a 9.426(1)
_cell_angle_alpha 90.000
_cell_length_b 9.909(1)
_cell_angle_beta  90.000
_cell_length_c 41.875(1)
_cell_angle_gamma 90.000
_cell_volume  3911(1)
_symmetry_cell_setting 'Orthorhombic '
_symmetry_space_group_name_H-M 'P c a b '
loop_
 _symmetry_equiv_pos_as_xyz
 'x,y,z'
 '-x,-y,-z'
 '-x+1/2,y,z+1/2'
 'x+1/2,-y,-z+1/2'
 'x+1/2,-y+1/2,z'
 '-x+1/2,y+1/2,-z'
 '-x,-y+1/2,z+1/2'
 'x,y+1/2,-z+1/2'
loop_
_atom_type_symbol
_atom_type_scat_dispersion_real
_atom_type_scat_dispersion_imag
_atom_type_scat_Cromer_Mann_a1
_atom_type_scat_Cromer_Mann_b1
_atom_type_scat_Cromer_Mann_a2
_atom_type_scat_Cromer_Mann_b2
_atom_type_scat_Cromer_Mann_a3
_atom_type_scat_Cromer_Mann_b3
_atom_type_scat_Cromer_Mann_a4
_atom_type_scat_Cromer_Mann_b4
_atom_type_scat_Cromer_Mann_c
_atom_type_scat_source
 'C   '    0.0020    0.0020    2.3100   20.8439
    1.0200   10.2075    1.5886    0.5687    0.8650   51.6512    0.2156
'International_Tables_Vol_IV_Table_2.2B'
 'H   '    0.0000    0.0000    0.4930   10.5109
    0.3229   26.1257    0.1402    3.1424    0.0408   57.7997    0.0030
'International_Tables_Vol_IV_Table_2.2B'
 'Fe  '    0.3010    0.8450   11.7695    4.7611
    7.3573    0.3072    3.5222   15.3535    2.3045   76.8805    1.0369
'International_Tables_Vol_IV_Table_2.2B'
_chemical_formula_sum
' C26 H22 Fe2 '
_chemical_formula_moiety
' C26 H22 Fe2 '
_chemical_formula_weight   446.16
_cell_measurement_reflns_used        25
_cell_measurement_theta_min        12
_cell_measurement_theta_max        16
_cell_measurement_temperature        24
_cell_formula_units_Z     8
_exptl_crystal_description 'losange '
_exptl_crystal_colour ' orange '
_exptl_crystal_size_min 0.2
_exptl_crystal_size_mid 0.2
_exptl_crystal_size_max 0.8
_exptl_crystal_density_diffrn 1.52
_exptl_crystal_density_meas ?
_exptl_crystal_F_000 1844.90
_exptl_absorpt_coefficient_mu 1.49
_exptl_absorpt_correction_type refdelf
_diffrn_standards_interval_time 3600
_diffrn_standards_interval_count ?
_diffrn_standards_number 2
_diffrn_standards_decay_% 6.29
_diffrn_ambient_temperature  24
_diffrn_reflns_number 5635
_reflns_number_total 3421
_diffrn_reflns_av_R_equivalents 0.03
_reflns_number_observed 1409
_diffrn_reflns_theta_min 2.0
_diffrn_reflns_theta_max 25
_diffrn_reflns_limit_h_min 0
_diffrn_reflns_limit_h_max 11
_diffrn_reflns_limit_k_min 0
_diffrn_reflns_limit_k_max 11
_diffrn_reflns_limit_l_min 0
_diffrn_reflns_limit_l_max 49
_reflns_limit_h_min 0
_reflns_limit_h_max 11
_reflns_limit_k_min 0
_reflns_limit_k_max 11
_reflns_limit_l_min 0
_reflns_limit_l_max 49
_reflns_observed_criterion  >3.00\s(I)
_refine_diff_density_min -0.70
_refine_diff_density_max 0.63
_refine_ls_number_reflns 1409
_refine_ls_number_parameters 254
_refine_ls_R_factor_obs 0.0594
_refine_ls_wR_factor_obs 0.0517
_refine_ls_goodness_of_fit_obs 0.9716
_refine_ls_shift/esd_max 0.007073
_refine_ls_structure_factor_coef F
_diffrn_radiation_type       'Mo K\a'
_diffrn_radiation_wavelength      0.71069
 
 
# NOW ALL THE GOODIES TO BE ENTERED BY HAND
 
 
_diffrn_radiation_monochromator      graphite
_diffrn_measurement_device     '  Enraf-nonius CAD4 '
_diffrn_measurement_method 2\q/\w
_refine_ls_matrix_type                   full
_refine_ls_weighting_scheme
;
 Chebychev polynomial (Carruthers & Watkin, 1979)
;
_atom_sites_solution_primary   Direct_Methods
_atom_sites_solution_hydrogens       Geometric
_refine_ls_hydrogen_treatment
;
 H atoms placed geometrically after each cycle
;
 
loop_
_atom_site_label
_atom_site_fract_x
_atom_site_fract_y
_atom_site_fract_z
_atom_site_U_iso_or_equiv
_atom_site_occupancy
_atom_site_thermal_displace_type
 FE1 0.7040(1) -0.0719(1) 0.18303(3) 0.0356 1.0000 Uani
 FE2 0.3109(1) -0.0170(1) 0.05281(3) 0.0411 1.0000 Uani
 C10 0.5472(8) -0.0347(7) 0.1496(2) 0.0296 1.0000 Uani
 C11 0.5673(9) -0.1766(8) 0.1542(2) 0.0372 1.0000 Uani
 C12 0.709(1) -0.2096(7) 0.1466(2) 0.0411 1.0000 Uani
 C13 0.779(1) -0.0863(8) 0.1374(2) 0.0438 1.0000 Uani
 C14 0.680(1) 0.0188(8) 0.1394(2) 0.0398 1.0000 Uani
 C15 0.772(1) -0.168(1) 0.2234(2) 0.0617 1.0000 Uani
 C16 0.645(1) -0.097(1) 0.2294(2) 0.0555 1.0000 Uani
 C17 0.668(1) 0.040(1) 0.2231(2) 0.0516 1.0000 Uani
 C18 0.811(1) 0.0557(9) 0.2135(2) 0.0517 1.0000 Uani
 C19 0.873(1) -0.072(1) 0.2134(2) 0.0498 1.0000 Uani
 C20 0.3949(9) 0.0760(7) 0.0922(2) 0.0332 1.0000 Uani
 C21 0.3624(9) 0.1732(8) 0.0677(2) 0.0423 1.0000 Uani
 C22 0.440(1) 0.1385(9) 0.0398(2) 0.0487 1.0000 Uani
 C23 0.5223(9) 0.0223(9) 0.0464(2) 0.0461 1.0000 Uani
 C24 0.4943(9) -0.0165(8) 0.0783(2) 0.0393 1.0000 Uani
 C25 0.239(1) -0.2109(9) 0.0538(3) 0.0656 1.0000 Uani
 C26 0.256(1) -0.169(1) 0.0222(2) 0.0605 1.0000 Uani
 C27 0.170(1) -0.054(1) 0.0171(3) 0.0670 1.0000 Uani
 C28 0.101(1) -0.028(1) 0.0452(3) 0.0662 1.0000 Uani
 C29 0.138(1) -0.124(1) 0.0681(2) 0.0602 1.0000 Uani
 C100 0.4060(8) 0.0320(7) 0.1521(2) 0.0321 1.0000 Uani
 C101 0.3330(8) 0.0762(7) 0.1248(2) 0.0329 1.0000 Uani
 C102 0.193(1) 0.1244(8) 0.1283(2) 0.0415 1.0000 Uani
 C103 0.131(1) 0.1308(9) 0.1578(2) 0.0459 1.0000 Uani
 C104 0.199(1) 0.0896(8) 0.1847(2) 0.0486 1.0000 Uani
 C105 0.3375(8) 0.0400(8) 0.1818(2) 0.0398 1.0000 Uani
 H11 0.4946 -0.2406 0.1612 0.0600 1.0000 Uiso
 H12 0.7514 -0.2997 0.1475 0.0600 1.0000 Uiso
 H13 0.8790 -0.0778 0.1311 0.0600 1.0000 Uiso
 H14 0.6991 0.1142 0.1347 0.0600 1.0000 Uiso
 H15 0.7877 -0.2660 0.2251 0.0600 1.0000 Uiso
 H16 0.5555 -0.1364 0.2375 0.0600 1.0000 Uiso
 H17 0.5966 0.1111 0.2246 0.0600 1.0000 Uiso
 H18 0.8590 0.1416 0.2082 0.0600 1.0000 Uiso
 H19 0.9712 -0.0913 0.2076 0.0600 1.0000 Uiso
 H21 0.2986 0.2494 0.0696 0.0600 1.0000 Uiso
 H22 0.4376 0.1865 0.0192 0.0600 1.0000 Uiso
 H23 0.5862 -0.0230 0.0317 0.0600 1.0000 Uiso
 H24 0.5359 -0.0946 0.0887 0.0600 1.0000 Uiso
 H25 0.2867 -0.2865 0.0642 0.0600 1.0000 Uiso
 H26 0.3189 -0.2105 0.0065 0.0600 1.0000 Uiso
 H27 0.1621 -0.0079 -0.0034 0.0600 1.0000 Uiso
 H28 0.0374 0.0494 0.0485 0.0600 1.0000 Uiso
 H29 0.0988 -0.1290 0.0897 0.0600 1.0000 Uiso
 H102 0.1393 0.1535 0.1094 0.0600 1.0000 Uiso
 H103 0.0357 0.1659 0.1597 0.0600 1.0000 Uiso
 H104 0.1517 0.0954 0.2056 0.0600 1.0000 Uiso
 H105 0.3885 0.0096 0.2011 0.0600 1.0000 Uiso
loop_
_atom_site_aniso_label
_atom_site_aniso_U_11
_atom_site_aniso_U_22
_atom_site_aniso_U_33
_atom_site_aniso_U_23
_atom_site_aniso_U_13
_atom_site_aniso_U_12
 FE1 0.0351(7) 0.0301(6) 0.0437(7) -0.0007(5) -0.0054(7) -0.0028(6)
 FE2 0.0396(7) 0.0365(7) 0.0499(7) 0.0029(6) -0.0076(7) -0.0032(7)
 C10 0.029(5) 0.025(4) 0.038(5) 0.001(3) -0.007(3) 0.001(3)
 C11 0.035(5) 0.032(4) 0.049(5) -0.004(4) -0.008(4) -0.003(4)
 C12 0.046(6) 0.039(5) 0.047(5) -0.008(3) -0.016(5) 0.010(5)
 C13 0.049(6) 0.041(5) 0.042(5) -0.003(4) -0.003(4) 0.001(5)
 C14 0.047(5) 0.035(4) 0.041(4) 0.007(3) 0.001(4) 0.001(5)
 C15 0.090(9) 0.062(7) 0.049(6) 0.011(5) -0.022(6) -0.001(7)
 C16 0.057(7) 0.075(8) 0.040(6) 0.001(5) 0.000(5) -0.002(6)
 C17 0.054(7) 0.058(7) 0.055(6) -0.024(5) -0.009(5) 0.009(5)
 C18 0.049(6) 0.054(6) 0.068(6) -0.019(5) -0.005(6) -0.015(6)
 C19 0.041(5) 0.067(7) 0.047(6) -0.006(5) -0.006(5) -0.003(6)
 C20 0.030(5) 0.025(4) 0.051(5) -0.004(4) -0.000(4) -0.005(4)
 C21 0.041(5) 0.028(5) 0.066(6) 0.004(4) 0.002(4) -0.002(4)
 C22 0.057(6) 0.050(6) 0.043(5) 0.007(4) -0.004(5) -0.009(5)
 C23 0.044(5) 0.054(6) 0.043(6) -0.008(4) 0.001(4) -0.004(5)
 C24 0.041(5) 0.038(5) 0.040(5) -0.005(4) -0.005(4) -0.001(4)
 C25 0.082(8) 0.041(6) 0.091(8) -0.004(5) -0.006(7) -0.014(6)
 C26 0.068(8) 0.077(7) 0.057(7) -0.023(5) 0.003(6) -0.028(6)
 C27 0.062(7) 0.094(9) 0.068(8) 0.012(6) -0.022(6) -0.028(7)
 C28 0.051(6) 0.074(8) 0.079(9) -0.012(6) -0.001(6) -0.003(6)
 C29 0.058(7) 0.072(8) 0.063(7) 0.002(6) -0.001(6) -0.027(6)
 C100 0.033(5) 0.024(4) 0.042(5) 0.000(3) -0.001(4) -0.004(4)
 C101 0.037(5) 0.024(4) 0.041(5) -0.003(3) 0.007(4) 0.000(4)
 C102 0.042(5) 0.031(4) 0.058(5) -0.000(4) -0.001(5) 0.009(4)
 C103 0.041(5) 0.041(5) 0.064(6) -0.004(4) 0.012(5) 0.007(4)
 C104 0.050(5) 0.051(5) 0.048(4) -0.008(4) 0.009(6) 0.001(5)
 C105 0.040(5) 0.037(5) 0.045(5) 0.003(4) -0.004(4) -0.009(3)
_refine_ls_extinction_coef 33.8(117)
_refine_ls_extinction_method
    'Larson 1970 Crystallographic Computing eq 22'
loop_
 _geom_bond_atom_site_label_1
 _geom_bond_site_symmetry_1
 _geom_bond_atom_site_label_2
 _geom_bond_site_symmetry_2
 _geom_bond_distance
 _geom_bond_publ_flag
FE1 . C10 . 2.068(7)    no
FE1 . C11 . 2.049(8)    no
FE1 . C12 . 2.048(8)    no
FE1 . C13 . 2.044(8)    no
FE1 . C14 . 2.049(8)    no
FE1 . C15 . 2.043(9)    no
FE1 . C16 . 2.037(9)    no
FE1 . C17 . 2.041(9)    no
FE1 . C18 . 2.064(9)    no
FE1 . C19 . 2.040(9)    no
FE2 . C20 . 2.050(8)    no
FE2 . C21 . 2.044(8)    no
FE2 . C22 . 2.039(9)    no
FE2 . C23 . 2.048(9)    no
FE2 . C24 . 2.031(8)    no
FE2 . C25 . 2.038(9)    no
FE2 . C26 . 2.043(9)    no
FE2 . C27 . 2.03(1)    no
FE2 . C28 . 2.01(1)    no
FE2 . C29 . 2.04(1)    no
C10 . C11 . 1.43(1)    no
C10 . C14 . 1.42(1)    no
C10 . C100 . 1.49(1)    yes
C11 . C12 . 1.41(1)    no
C11 . H11 . 0.979(8)    no
C12 . C13 . 1.44(1)    no
C12 . H12 . 0.980(7)    no
C13 . C14 . 1.40(1)    no
C13 . H13 . 0.981(9)    no
C14 . H14 . 0.983(8)    no
C15 . C16 . 1.42(1)    no
C15 . C19 . 1.41(1)    no
C15 . H15 . 0.98(1)    no
C16 . C17 . 1.40(1)    no
C16 . H16 . 0.99(1)    no
C17 . C18 . 1.42(1)    no
C17 . H17 . 0.97(1)    no
C18 . C19 . 1.40(1)    no
C18 . H18 . 0.988(9)    no
C19 . H19 . 0.97(1)    no
C20 . C21 . 1.44(1)    no
C20 . C24 . 1.43(1)    no
C20 . C101 . 1.48(1)    yes
C21 . C22 . 1.42(1)    no
C21 . H21 . 0.969(9)    no
C22 . C23 . 1.42(1)    no
C22 . H22 . 0.985(8)    no
C23 . C24 . 1.41(1)    no
C23 . H23 . 0.970(9)    no
C24 . H24 . 0.972(8)    no
C25 . C26 . 1.40(1)    no
C25 . C29 . 1.42(1)    no
C25 . H25 . 0.98(1)    no
C26 . C27 . 1.41(1)    no
C26 . H26 . 0.98(1)    no
C27 . C28 . 1.37(1)    no
C27 . H27 . 0.98(1)    no
C28 . C29 . 1.40(1)    no
C28 . H28 . 0.98(1)    no
C29 . H29 . 0.98(1)    no
C100 . C101 . 1.41(1)    no
C100 . C105 . 1.40(1)    no
C101 . C102 . 1.42(1)    no
C102 . C103 . 1.37(1)    no
C102 . H102 . 0.981(8)    no
C103 . C104 . 1.36(1)    no
C103 . H103 . 0.962(9)    no
C104 . C105 . 1.40(1)    no
C104 . H104 . 0.983(8)    no
C105 . H105 . 0.990(8)    no
loop_
 _geom_angle_atom_site_label_1
 _geom_angle_site_symmetry_1
 _geom_angle_atom_site_label_2
 _geom_angle_site_symmetry_2
 _geom_angle_atom_site_label_3
 _geom_angle_site_symmetry_3
 _geom_angle
 _geom_angle_publ_flag
C10 . FE1 . C11 . 40.7(3)    no
C10 . FE1 . C12 . 68.3(3)    no
C11 . FE1 . C12 . 40.2(3)    no
C10 . FE1 . C13 . 68.1(3)    no
C11 . FE1 . C13 . 68.3(3)    no
C12 . FE1 . C13 . 41.3(3)    no
C10 . FE1 . C14 . 40.4(3)    no
C11 . FE1 . C14 . 68.0(3)    no
C12 . FE1 . C14 . 68.3(3)    no
C13 . FE1 . C14 . 40.1(3)    no
C10 . FE1 . C15 . 150.2(4)    no
C11 . FE1 . C15 . 116.8(4)    no
C12 . FE1 . C15 . 107.4(4)    no
C13 . FE1 . C15 . 129.1(4)    no
C14 . FE1 . C15 . 167.6(5)    no
C10 . FE1 . C16 . 118.1(4)    no
C11 . FE1 . C16 . 109.2(4)    no
C12 . FE1 . C16 . 129.5(4)    no
C13 . FE1 . C16 . 168.2(4)    no
C14 . FE1 . C16 . 150.8(4)    no
C10 . FE1 . C17 . 109.8(3)    no
C11 . FE1 . C17 . 131.0(4)    no
C12 . FE1 . C17 . 168.3(4)    no
C13 . FE1 . C17 . 149.8(4)    no
C14 . FE1 . C17 . 118.3(4)    no
C10 . FE1 . C18 . 131.3(4)    no
C11 . FE1 . C18 . 169.9(4)    no
C12 . FE1 . C18 . 149.2(4)    no
C13 . FE1 . C18 . 116.9(4)    no
C14 . FE1 . C18 . 109.8(4)    no
C10 . FE1 . C19 . 168.8(4)    no
C11 . FE1 . C19 . 149.1(4)    no
C12 . FE1 . C19 . 116.5(4)    no
C13 . FE1 . C19 . 108.2(4)    no
C14 . FE1 . C19 . 130.1(4)    no
C15 . FE1 . C16 . 40.7(4)    no
C15 . FE1 . C17 . 68.2(4)    no
C16 . FE1 . C17 . 40.2(4)    no
C15 . FE1 . C18 . 67.6(4)    no
C16 . FE1 . C18 . 67.5(4)    no
C17 . FE1 . C18 . 40.5(4)    no
C15 . FE1 . C19 . 40.3(4)    no
C16 . FE1 . C19 . 67.6(4)    no
C17 . FE1 . C19 . 67.6(4)    no
C18 . FE1 . C19 . 39.8(4)    no
C20 . FE2 . C21 . 41.3(3)    no
C20 . FE2 . C22 . 69.2(3)    no
C21 . FE2 . C22 . 40.8(3)    no
C20 . FE2 . C23 . 69.1(3)    no
C21 . FE2 . C23 . 68.5(3)    no
C22 . FE2 . C23 . 40.5(3)    no
C20 . FE2 . C24 . 41.2(3)    no
C21 . FE2 . C24 . 68.6(3)    no
C22 . FE2 . C24 . 68.3(4)    no
C23 . FE2 . C24 . 40.5(3)    no
C20 . FE2 . C25 . 122.4(4)    no
C21 . FE2 . C25 . 160.5(4)    no
C22 . FE2 . C25 . 156.4(5)    no
C23 . FE2 . C25 . 120.3(4)    no
C24 . FE2 . C25 . 105.9(4)    no
C20 . FE2 . C26 . 159.2(4)    no
C21 . FE2 . C26 . 158.4(4)    no
C22 . FE2 . C26 . 122.6(4)    no
C23 . FE2 . C26 . 107.8(4)    no
C24 . FE2 . C26 . 123.2(4)    no
C20 . FE2 . C27 . 157.9(5)    no
C21 . FE2 . C27 . 123.2(5)    no
C22 . FE2 . C27 . 109.3(4)    no
C23 . FE2 . C27 . 125.0(4)    no
C24 . FE2 . C27 . 160.4(5)    no
C20 . FE2 . C28 . 122.2(4)    no
C21 . FE2 . C28 . 109.3(4)    no
C22 . FE2 . C28 . 125.8(5)    no
C23 . FE2 . C28 . 161.5(4)    no
C24 . FE2 . C28 . 157.3(4)    no
C20 . FE2 . C29 . 106.7(4)    no
C21 . FE2 . C29 . 124.8(4)    no
C22 . FE2 . C29 . 161.9(5)    no
C23 . FE2 . C29 . 156.1(4)    no
C24 . FE2 . C29 . 121.0(4)    no
C25 . FE2 . C26 . 40.1(4)    no
C25 . FE2 . C27 . 68.0(5)    no
C26 . FE2 . C27 . 40.4(4)    no
C25 . FE2 . C28 . 68.1(5)    no
C26 . FE2 . C28 . 67.1(4)    no
C27 . FE2 . C28 . 39.7(4)    no
C25 . FE2 . C29 . 40.7(4)    no
C26 . FE2 . C29 . 67.3(4)    no
C27 . FE2 . C29 . 67.4(4)    no
C28 . FE2 . C29 . 40.3(4)    no
FE1 . C10 . C11 . 68.9(4)    no
FE1 . C10 . C14 . 69.1(4)    no
C11 . C10 . C14 . 106.8(7)    no
FE1 . C10 . C100 . 132.0(6)    no
C11 . C10 . C100 . 123.0(7)    no
C14 . C10 . C100 . 129.8(6)    no
FE1 . C11 . C10 . 70.4(4)    no
FE1 . C11 . C12 . 69.8(5)    no
C10 . C11 . C12 . 108.9(7)    no
FE1 . C11 . H11 . 126.3(6)    no
C10 . C11 . H11 . 125.7(8)    no
C12 . C11 . H11 . 125.4(8)    no
FE1 . C12 . C11 . 69.9(4)    no
FE1 . C12 . C13 . 69.2(4)    no
C11 . C12 . C13 . 107.4(7)    no
FE1 . C12 . H12 . 126.0(6)    no
C11 . C12 . H12 . 126.3(9)    no
C13 . C12 . H12 . 126.3(9)    no
FE1 . C13 . C12 . 69.5(5)    no
FE1 . C13 . C14 . 70.1(5)    no
C12 . C13 . C14 . 107.7(8)    no
FE1 . C13 . H13 . 125.3(6)    no
C12 . C13 . H13 . 125.9(8)    no
C14 . C13 . H13 . 126.4(8)    no
FE1 . C14 . C10 . 70.5(4)    no
FE1 . C14 . C13 . 69.7(4)    no
C10 . C14 . C13 . 109.2(7)    no
FE1 . C14 . H14 . 125.4(6)    no
C10 . C14 . H14 . 125.6(9)    no
C13 . C14 . H14 . 125.2(9)    no
FE1 . C15 . C16 . 69.4(6)    no
FE1 . C15 . C19 . 69.8(5)    no
C16 . C15 . C19 . 106.9(8)    no
FE1 . C15 . H15 . 124.6(7)    no
C16 . C15 . H15 . 127.0(12)    no
C19 . C15 . H15 . 126.0(12)    no
FE1 . C16 . C15 . 69.9(6)    no
FE1 . C16 . C17 . 70.1(5)    no
C15 . C16 . C17 . 108.5(9)    no
FE1 . C16 . H16 . 127.4(8)    no
C15 . C16 . H16 . 125.9(11)    no
C17 . C16 . H16 . 125.5(11)    no
FE1 . C17 . C16 . 69.7(5)    no
FE1 . C17 . C18 . 70.6(5)    no
C16 . C17 . C18 . 107.7(8)    no
FE1 . C17 . H17 . 124.2(7)    no
C16 . C17 . H17 . 125.5(11)    no
C18 . C17 . H17 . 126.8(11)    no
FE1 . C18 . C17 . 68.9(5)    no
FE1 . C18 . C19 . 69.2(5)    no
C17 . C18 . C19 . 107.5(8)    no
FE1 . C18 . H18 . 127.5(8)    no
C17 . C18 . H18 . 126.1(10)    no
C19 . C18 . H18 . 126.4(10)    no
FE1 . C19 . C15 . 70.0(5)    no
FE1 . C19 . C18 . 71.0(5)    no
C15 . C19 . C18 . 109.3(9)    no
FE1 . C19 . H19 . 125.8(7)    no
C15 . C19 . H19 . 125.9(11)    no
C18 . C19 . H19 . 124.8(10)    no
FE2 . C20 . C21 . 69.2(5)    no
FE2 . C20 . C24 . 68.7(4)    no
C21 . C20 . C24 . 106.0(7)    no
FE2 . C20 . C101 . 126.1(6)    no
C21 . C20 . C101 . 124.8(7)    no
C24 . C20 . C101 . 129.2(7)    no
FE2 . C21 . C20 . 69.6(4)    no
FE2 . C21 . C22 . 69.4(5)    no
C20 . C21 . C22 . 108.4(7)    no
FE2 . C21 . H21 . 126.6(7)    no
C20 . C21 . H21 . 126.3(9)    no
C22 . C21 . H21 . 125.3(9)    no
FE2 . C22 . C21 . 69.8(5)    no
FE2 . C22 . C23 . 70.1(5)    no
C21 . C22 . C23 . 108.5(7)    no
FE2 . C22 . H22 . 125.9(7)    no
C21 . C22 . H22 . 126.2(9)    no
C23 . C22 . H22 . 125.3(9)    no
FE2 . C23 . C22 . 69.4(5)    no
FE2 . C23 . C24 . 69.1(5)    no
C22 . C23 . C24 . 107.8(7)    no
FE2 . C23 . H23 . 126.8(7)    no
C22 . C23 . H23 . 126.2(9)    no
C24 . C23 . H23 . 126.0(9)    no
FE2 . C24 . C20 . 70.1(4)    no
FE2 . C24 . C23 . 70.4(5)    no
C20 . C24 . C23 . 109.4(7)    no
FE2 . C24 . H24 . 125.3(6)    no
C20 . C24 . H24 . 126.0(9)    no
C23 . C24 . H24 . 124.5(8)    no
FE2 . C25 . C26 . 70.2(5)    no
FE2 . C25 . C29 . 69.9(5)    no
C26 . C25 . C29 . 107.1(10)    no
FE2 . C25 . H25 . 125.4(9)    no
C26 . C25 . H25 . 126.9(13)    no
C29 . C25 . H25 . 126.0(12)    no
FE2 . C26 . C25 . 69.8(5)    no
FE2 . C26 . C27 . 69.4(6)    no
C25 . C26 . C27 . 108.6(10)    no
FE2 . C26 . H26 . 125.3(8)    no
C25 . C26 . H26 . 125.2(13)    no
C27 . C26 . H26 . 126.2(12)    no
FE2 . C27 . C26 . 70.3(6)    no
FE2 . C27 . C28 . 69.3(6)    no
C26 . C27 . C28 . 107.6(10)    no
FE2 . C27 . H27 . 127.6(8)    no
C26 . C27 . H27 . 123.8(14)    no
C28 . C27 . H27 . 128.6(14)    no
FE2 . C28 . C27 . 71.0(6)    no
FE2 . C28 . C29 . 71.1(6)    no
C27 . C28 . C29 . 109.5(10)    no
FE2 . C28 . H28 . 122.6(8)    no
C27 . C28 . H28 . 124.3(13)    no
C29 . C28 . H28 . 126.1(12)    no
FE2 . C29 . C25 . 69.5(6)    no
FE2 . C29 . C28 . 68.6(6)    no
C25 . C29 . C28 . 107.2(10)    no
FE2 . C29 . H29 . 128.3(8)    no
C25 . C29 . H29 . 127.8(12)    no
C28 . C29 . H29 . 125.1(13)    no
C10 . C100 . C101 . 121.2(7)    no
C10 . C100 . C105 . 120.0(7)    no
C101 . C100 . C105 . 118.5(7)    no
C20 . C101 . C100 . 123.8(7)    no
C20 . C101 . C102 . 117.7(7)    no
C100 . C101 . C102 . 118.6(7)    no
C101 . C102 . C103 . 120.6(8)    no
C101 . C102 . H102 . 119.6(8)    no
C103 . C102 . H102 . 119.7(9)    no
C102 . C103 . C104 . 122.0(9)    no
C102 . C103 . H103 . 119.2(10)    no
C104 . C103 . H103 . 118.7(9)    no
C103 . C104 . C105 . 118.4(8)    no
C103 . C104 . H104 . 120.3(9)    no
C105 . C104 . H104 . 121.3(10)    no
C100 . C105 . C104 . 121.8(8)    no
C100 . C105 . H105 . 119.0(8)    no
C104 . C105 . H105 . 119.3(9)    no


_audit_creation_date        97-O5-20
_audit_creation_method      CRYSTALS
#  Inorg. Chem. IC970013M
# 1. SUBMISSION DETAILS
_publ_contact_author
;
 J.P. Launay, CEMES, BP4347, 29 Rue J. Marvig, 31055, Toulouse (Fr)            
;
_publ_contact_author_phone                      ' (33) 5 62 25 78 32 '
_publ_contact_author_fax                        ' (33) 5 62 25 79 99 '
_publ_contact_author_email                      ' launay@cemes.fr '
_publ_requested_journal                         'Inorganic Chemistry'
_publ_contact_letter
;
  Please consider this CIF submission for the paper IC970013M, Compound 3 (cl).
  The figures have been sent by mail, and structure factor listings 
  can be made available if requested.
;
#=============================================================================
# 2. PROCESSING SUMMARY (IUCr Office Use Only)
_journal_date_recd_electronic     ?
_journal_date_to_coeditor         ?
_journal_date_from_coeditor       ?
_journal_date_accepted            ?
_journal_date_printers_first      ?
_journal_date_printers_final      ?
_journal_date_proofs_out          ?
_journal_date_proofs_in           ?
_journal_coeditor_name            ?
_journal_coeditor_code            ?
_journal_coeditor_notes
;
                                  ?
;
_journal_techeditor_code          ?
_journal_techeditor_notes
;
                                  ?
;
_journal_coden_ASTM               ?
_journal_name_full                ?
_journal_year                     ?
_journal_volume                   ?
_journal_issue                    ?
_journal_page_first               ?
_journal_page_last                ?
_journal_suppl_publ_number        ?
_journal_suppl_publ_pages         ?
#=============================================================================
# 3. TITLE AND AUTHOR LIST
_publ_section_title
;
 Topological Effects on Intramolecular Electron Transfer via Quantum 
 Interference
;
# The loop structure below should contain the names and addresses of all
# authors, in the required order of publication. Repeat as necessary.
loop_
        _publ_author_name
        _publ_author_address
'Patoux, Cendrine'                               
;
CEMES, BP4347, 29 Rue J. Marvig, 31055, Toulouse (Fr)                         
;
'Coudret, Christophe'
;
CEMES, BP4347, 29 Rue J. Marvig, 31055, Toulouse (Fr)                         
;
'Launay, Jean-Pierre'
;
CEMES, BP4347, 29 Rue J. Marvig, 31055, Toulouse (Fr)                         
;
'Joachim, Christian'
;
CEMES, BP4347, 29 Rue J. Marvig, 31055, Toulouse (Fr)                         
;
'Gourdon, Andre'
;
CEMES, BP4347, 29 Rue J. Marvig, 31055, Toulouse (Fr)                         
;
#==============================================================================
# 4. TEXT
_publ_section_references
;
 
Altomare, A., Cascarano, G., Giacovazzo G., Guagliardi A., Burla M.C.,
Polidori, G.  & Camalli, M. (1994) SIR92 - a program for automatic solution of
crystal structures by direct methods. J. Appl. Cryst. (27), 435

Watkin, D.J., Prout, C.K. Carruthers, R.J. & Betteridge, P. (1996) CRYSTALS
Issue 10. Chemical Crystallography Laboratory, OXFORD, UK.
 
Watkin, D.J., Prout, C.K. & Pearce, L.J. (1996) CAMERON, Chemical
Crystallography Laboratory, OXFORD, UK.
 
Watkin, D.J., Prout, C.K., Lilley, P.M.deQ. (1994), RC93, Chemical
Crystallography Laboratory, Oxford, UK.
;
#==========================================================================
# Now, all the structure specific goodies
#==========================================================================
_computing_data_collection 'CAD-4 software (Enraf-Nonius, 1989)'
_computing_cell_refinement 'CAD-4 software (Enraf-Nonius, 1989)'
_computing_data_reduction
;
RC93 (Watkin, D.J., Prout, C.K., Lilley, P.M.deQ. 1994)
;
_computing_structure_refinement
;
CRYSTALS Issue 10 (Watkin, Prout, Carruthers & Betteridge, 1996)
;
_computing_publication_material
;
CRYSTALS Issue 10 (Watkin, Prout, Carruthers & Betteridge, 1996)
;
_computing_molecular_graphics
;
 CAMERON (Watkin, Prout & Pearce,  1996)
;
_computing_structure_solution 'SIR92 (Giacovazzo et al, 1992)'
_cell_length_a 14.92(1)
_cell_angle_alpha 90.000
_cell_length_b 8.022(3)
_cell_angle_beta  97.59(5)
_cell_length_c 17.40(1)
_cell_angle_gamma 90.000
_cell_volume  2064.33
_symmetry_cell_setting 'Monoclinic '
_symmetry_space_group_name_H-M 'P 1 21/n 1 '
loop_
 _symmetry_equiv_pos_as_xyz
 'x,y,z'
 '-x,-y,-z'
 '-x+1/2,y+1/2,-z+1/2'
 'x+1/2,-y+1/2,z+1/2'
loop_
_atom_type_symbol
_atom_type_scat_dispersion_real
_atom_type_scat_dispersion_imag
_atom_type_scat_Cromer_Mann_a1
_atom_type_scat_Cromer_Mann_b1
_atom_type_scat_Cromer_Mann_a2
_atom_type_scat_Cromer_Mann_b2
_atom_type_scat_Cromer_Mann_a3
_atom_type_scat_Cromer_Mann_b3
_atom_type_scat_Cromer_Mann_a4
_atom_type_scat_Cromer_Mann_b4
_atom_type_scat_Cromer_Mann_c
_atom_type_scat_source
 'C   '    0.0020    0.0020    2.3100   20.8439
    1.0200   10.2075    1.5886    0.5687    0.8650   51.6512    0.2156
'International_Tables_Vol_IV_Table_2.2B'
 'H   '    0.0000    0.0000    0.4930   10.5109
    0.3229   26.1257    0.1402    3.1424    0.0408   57.7997    0.0030
'International_Tables_Vol_IV_Table_2.2B'
 'Fe  '    0.3010    0.8450   11.7695    4.7611
    7.3573    0.3072    3.5222   15.3535    2.3045   76.8805    1.0369
'International_Tables_Vol_IV_Table_2.2B'
 'Cl  '    0.1320    0.1590   11.4604    0.0104
    7.1964    1.1662    6.2556   18.5194    1.6455   47.7784   -9.5574
'International_Tables_Vol_IV_Table_2.2B'
_chemical_formula_sum
' C26 H21 Fe2 Cl1 '
_chemical_formula_moiety
' C26 H21 Fe2 Cl1 '
_chemical_compound_source
;
?
;
_chemical_formula_weight   480.60
_cell_measurement_reflns_used       25
_cell_measurement_theta_min       13
_cell_measurement_theta_max       14
_cell_measurement_temperature      293
_cell_formula_units_Z     4
_exptl_crystal_description ' losange '
_exptl_crystal_colour ' orange '
_exptl_crystal_size_min 0.10
_exptl_crystal_size_mid 0.40
_exptl_crystal_size_max 0.40
_exptl_crystal_density_diffrn 1.55
_exptl_crystal_density_meas ?
_exptl_crystal_F_000 986.98
_exptl_absorpt_coefficient_mu 1.55
_exptl_absorpt_correction_type NONE
_diffrn_standards_interval_time 3600
_diffrn_standards_number 2
_diffrn_standards_decay_% 2.95
_diffrn_ambient_temperature        24
_diffrn_reflns_number 4670
_reflns_number_total 3571
_diffrn_reflns_av_R_equivalents 0.02
_reflns_number_observed 2863
_diffrn_reflns_theta_min 0.00
_diffrn_reflns_theta_max 26.00
_diffrn_reflns_limit_h_min -18
_diffrn_reflns_limit_h_max 18
_diffrn_reflns_limit_k_min -9
_diffrn_reflns_limit_k_max 0
_diffrn_reflns_limit_l_min -21
_diffrn_reflns_limit_l_max 0
_reflns_limit_h_min -18
_reflns_limit_h_max 18
_reflns_limit_k_min 0
_reflns_limit_k_max 9
_reflns_limit_l_min 0
_reflns_limit_l_max 21
_reflns_observed_criterion  >3.00\s(I)
_refine_diff_density_min -0.38
_refine_diff_density_max 0.52
_refine_ls_number_reflns 2863
_refine_ls_number_parameters 263
_refine_ls_R_factor_obs 0.0366
_refine_ls_wR_factor_obs 0.0394
_refine_ls_goodness_of_fit_obs 1.6395
_refine_ls_shift/esd_max 0.103200
_refine_ls_abs_structure_details ' from Flack enantiopole 0.000'
_refine_ls_structure_factor_coef F
_diffrn_radiation_type       'Mo K\a'
_diffrn_radiation_wavelength      0.71069
 
 
# NOW ALL THE GOODIES TO BE ENTERED BY HAND
 
 
_diffrn_radiation_monochromator      graphite
_diffrn_measurement_device     '  Enraf-nonius CAD4 '
_diffrn_measurement_method 2\q/\w
_refine_ls_matrix_type                   full
_refine_ls_weighting_scheme
;
 unit
;
_atom_sites_solution_primary   Direct_Methods
_atom_sites_solution_hydrogens       Geometric
_refine_ls_hydrogen_treatment
;
 H atoms placed geometrically after each cycle
;
loop_
_atom_site_label
_atom_site_fract_x
_atom_site_fract_y
_atom_site_fract_z
_atom_site_U_iso_or_equiv
_atom_site_occupancy
_atom_site_thermal_displace_type
 FE1 0.26335(4) -0.06951(8) -0.09559(3) 0.0366 1.0000 Uani
 FE2 0.40119(4) 0.07463(8) 0.34686(3) 0.0331 1.0000 Uani
 CL106 0.5314(1) -0.5274(2) 0.12711(7) 0.0529 1.0000 Uani
 C10 0.3615(3) -0.0196(5) -0.0048(2) 0.0348 1.0000 Uani
 C11 0.2971(3) 0.1122(6) -0.0159(3) 0.0487 1.0000 Uani
 C12 0.2966(4) 0.1761(6) -0.0915(3) 0.0538 1.0000 Uani
 C13 0.3590(3) 0.0867(6) -0.1288(3) 0.0471 1.0000 Uani
 C14 0.3995(3) -0.0345(6) -0.0755(2) 0.0387 1.0000 Uani
 C15 0.1805(4) -0.2506(8) -0.0663(4) 0.0638 1.0000 Uani
 C16 0.1313(4) -0.1252(9) -0.1018(6) 0.0760 1.0000 Uani
 C17 0.1540(8) -0.109(2) -0.1728(6) 0.0760 1.0000 Uani
 C18 0.217(1) -0.212(2) -0.1846(6) 0.1038 1.0000 Uani
 C19 0.2339(5) -0.3103(9) -0.1179(7) 0.0746 1.0000 Uani
 C20 0.3526(3) -0.1183(5) 0.2773(2) 0.0329 1.0000 Uani
 C21 0.3881(3) -0.1772(5) 0.3527(2) 0.0389 1.0000 Uani
 C22 0.3394(3) -0.0998(6) 0.4080(2) 0.0439 1.0000 Uani
 C23 0.2741(3) 0.0079(6) 0.3678(2) 0.0420 1.0000 Uani
 C24 0.2818(3) -0.0031(6) 0.2878(2) 0.0376 1.0000 Uani
 C25 0.5353(3) 0.1317(7) 0.3723(3) 0.0535 1.0000 Uani
 C26 0.4849(3) 0.2183(7) 0.4216(3) 0.0534 1.0000 Uani
 C27 0.4208(4) 0.3185(6) 0.3751(4) 0.0581 1.0000 Uani
 C28 0.4321(4) 0.2920(6) 0.2970(3) 0.0587 1.0000 Uani
 C29 0.5026(3) 0.1757(7) 0.2947(3) 0.0541 1.0000 Uani
 C100 0.3848(3) -0.1202(5) 0.0656(2) 0.0313 1.0000 Uani
 C101 0.3580(3) -0.0747(5) 0.1363(2) 0.0329 1.0000 Uani
 C102 0.3832(3) -0.1641(5) 0.2033(2) 0.0325 1.0000 Uani
 C103 0.4378(3) -0.3058(5) 0.2002(2) 0.0336 1.0000 Uani
 C104 0.4633(3) -0.3508(5) 0.1303(2) 0.0342 1.0000 Uani
 C105 0.4379(3) -0.2632(5) 0.0632(2) 0.0362 1.0000 Uani
 H11 0.2596 0.1518 0.0225 0.0600 1.0000 Uiso
 H12 0.2588 0.2681 -0.1143 0.0600 1.0000 Uiso
 H13 0.3724 0.1044 -0.1818 0.0600 1.0000 Uiso
 H14 0.4458 -0.1151 -0.0856 0.0600 1.0000 Uiso
 H15 0.1783 -0.2911 -0.0135 0.0600 1.0000 Uiso
 H16 0.0866 -0.0579 -0.0793 0.0600 1.0000 Uiso
 H17 0.1264 -0.0284 -0.2112 0.0600 1.0000 Uiso
 H18 0.2472 -0.2200 -0.2312 0.0600 1.0000 Uiso
 H19 0.2760 -0.4044 -0.1097 0.0600 1.0000 Uiso
 H21 0.4377 -0.2572 0.3644 0.0600 1.0000 Uiso
 H22 0.3493 -0.1179 0.4642 0.0600 1.0000 Uiso
 H23 0.2311 0.0777 0.3913 0.0600 1.0000 Uiso
 H24 0.2449 0.0581 0.2463 0.0600 1.0000 Uiso
 H25 0.5848 0.0538 0.3885 0.0600 1.0000 Uiso
 H26 0.4925 0.2111 0.4783 0.0600 1.0000 Uiso
 H27 0.3765 0.3930 0.3940 0.0600 1.0000 Uiso
 H28 0.3970 0.3451 0.2520 0.0600 1.0000 Uiso
 H29 0.5250 0.1332 0.2480 0.0600 1.0000 Uiso
 H101 0.3199 0.0243 0.1385 0.0600 1.0000 Uiso
 H103 0.4573 -0.3711 0.2471 0.0600 1.0000 Uiso
 H105 0.4567 -0.3005 0.0142 0.0600 1.0000 Uiso
loop_
_atom_site_aniso_label
_atom_site_aniso_U_11
_atom_site_aniso_U_22
_atom_site_aniso_U_33
_atom_site_aniso_U_23
_atom_site_aniso_U_13
_atom_site_aniso_U_12
 FE1 0.0325(3) 0.0452(4) 0.0335(3) 0.0041(3) -0.0022(2) -0.0030(3)
 FE2 0.0305(3) 0.0340(3) 0.0348(3) -0.0021(3) 0.0021(2) 0.0027(3)
 CL106 0.0822(9) 0.0513(7) 0.0486(6) -0.0003(6) 0.0101(6) 0.0335(7)
 C10 0.041(2) 0.031(2) 0.034(2) -0.003(2) -0.005(2) -0.005(2)
 C11 0.068(3) 0.038(3) 0.047(3) -0.003(2) -0.003(2) 0.013(2)
 C12 0.084(4) 0.038(3) 0.051(3) 0.009(2) -0.011(3) 0.003(3)
 C13 0.051(3) 0.050(3) 0.048(3) 0.015(2) 0.002(2) -0.013(2)
 C14 0.032(2) 0.046(3) 0.042(2) 0.006(2) 0.002(2) -0.010(2)
 C15 0.068(4) 0.071(4) 0.074(4) 0.019(3) -0.007(3) -0.034(3)
 C16 0.026(3) 0.086(5) 0.192(9) 0.008(6) 0.001(4) -0.002(3)
 C17 0.149(9) 0.23(1) 0.110(7) 0.119(9) -0.108(7) -0.14(1)
 C18 0.21(1) 0.32(2) 0.095(7) -0.13(1) 0.079(9) -0.20(1)
 C19 0.048(4) 0.054(4) 0.24(1) -0.062(6) 0.004(6) -0.014(3)
 C20 0.033(2) 0.032(2) 0.034(2) -0.003(2) 0.001(2) -0.003(2)
 C21 0.045(3) 0.034(2) 0.038(2) 0.001(2) 0.003(2) 0.001(2)
 C22 0.049(3) 0.047(3) 0.038(2) 0.004(2) 0.010(2) 0.000(2)
 C23 0.033(2) 0.059(3) 0.041(2) -0.006(2) 0.011(2) -0.000(2)
 C24 0.028(2) 0.046(2) 0.041(2) -0.003(2) 0.001(2) 0.002(2)
 C25 0.034(2) 0.062(3) 0.072(4) -0.008(3) -0.002(2) -0.004(2)
 C26 0.047(3) 0.063(3) 0.062(3) -0.022(3) -0.004(2) -0.012(3)
 C27 0.060(3) 0.039(3) 0.095(4) -0.020(3) 0.009(3) -0.005(2)
 C28 0.067(3) 0.044(3) 0.073(4) 0.012(3) 0.001(3) -0.010(3)
 C29 0.051(3) 0.058(3) 0.072(4) -0.006(3) 0.023(3) -0.019(3)
 C100 0.031(2) 0.029(2) 0.035(2) -0.002(2) -0.006(2) -0.003(2)
 C101 0.035(2) 0.030(2) 0.035(2) -0.004(2) -0.002(2) 0.002(2)
 C102 0.029(2) 0.034(2) 0.036(2) -0.007(2) -0.001(2) -0.005(2)
 C103 0.036(2) 0.030(2) 0.034(2) 0.002(2) -0.002(2) -0.002(2)
 C104 0.036(2) 0.027(2) 0.041(2) -0.005(2) 0.002(2) 0.004(2)
 C105 0.040(2) 0.038(2) 0.031(2) -0.005(2) 0.002(2) 0.002(2)
_refine_ls_extinction_coef 87.1(38)
_refine_ls_extinction_method
    'Larson 1970 Crystallographic Computing eq 22'
loop_
 _geom_bond_atom_site_label_1
 _geom_bond_site_symmetry_1
 _geom_bond_atom_site_label_2
 _geom_bond_site_symmetry_2
 _geom_bond_distance
 _geom_bond_publ_flag
FE1 . C10 . 2.046(4)    no
FE1 . C11 . 2.029(5)    no
FE1 . C12 . 2.031(5)    no
FE1 . C13 . 2.039(4)    no
FE1 . C14 . 2.034(4)    no
FE1 . C15 . 2.016(5)    no
FE1 . C16 . 2.009(5)    no
FE1 . C17 . 1.996(6)    no
FE1 . C18 . 1.975(9)    no
FE1 . C19 . 2.008(6)    no
FE2 . C20 . 2.038(4)    no
FE2 . C21 . 2.033(4)    no
FE2 . C22 . 2.049(4)    no
FE2 . C23 . 2.049(4)    no
FE2 . C24 . 2.033(4)    no
FE2 . C25 . 2.043(5)    no
FE2 . C26 . 2.038(5)    no
FE2 . C27 . 2.028(5)    no
FE2 . C28 . 2.027(5)    no
FE2 . C29 . 2.033(5)    no
CL106 . C104 . 1.749(4)    no
C10 . C11 . 1.424(6)    no
C10 . C14 . 1.425(6)    no
C10 . C100 . 1.471(5)   yes
C11 . C12 . 1.411(7)    no
C11 . H11 . 0.980(5)    no
C12 . C13 . 1.400(7)    no
C12 . H12 . 0.980(5)    no
C13 . C14 . 1.422(6)    no
C13 . H13 . 0.980(5)    no
C14 . H14 . 0.980(4)    no
C15 . C16 . 1.346(9)    no
C15 . C19 . 1.36(1)    no
C15 . H15 . 0.980(6)    no
C16 . C17 . 1.33(1)    no
C16 . H16 . 0.980(7)    no
C17 . C18 . 1.29(2)    no
C17 . H17 . 0.980(9)    no
C18 . C19 . 1.40(2)    no
C18 . H18 . 0.980(9)    no
C19 . H19 . 0.980(7)    no
C20 . C21 . 1.428(6)    no
C20 . C24 . 1.433(6)    no
C20 . C102 . 1.468(5)    yes
C21 . C22 . 1.423(6)    no
C21 . H21 . 0.980(4)    no
C22 . C23 . 1.416(6)    no
C22 . H22 . 0.980(4)    no
C23 . C24 . 1.416(6)    no
C23 . H23 . 0.980(4)    no
C24 . H24 . 0.980(4)    no
C25 . C26 . 1.398(7)    no
C25 . C29 . 1.417(7)    no
C25 . H25 . 0.980(5)    no
C26 . C27 . 1.418(7)    no
C26 . H26 . 0.980(5)    no
C27 . C28 . 1.406(8)    no
C27 . H27 . 0.980(5)    no
C28 . C29 . 1.411(7)    no
C28 . H28 . 0.980(5)    no
C29 . H29 . 0.980(5)    no
C100 . C101 . 1.391(5)    no
C100 . C105 . 1.397(5)    no
C101 . C102 . 1.379(5)    no
C101 . H101 . 0.980(4)    no
C102 . C103 . 1.404(5)    no
C103 . C104 . 1.370(6)    no
C103 . H103 . 0.980(4)    no
C104 . C105 . 1.372(6)    no
C105 . H105 . 0.980(4)    no
loop_
 _geom_angle_atom_site_label_1
 _geom_angle_site_symmetry_1
 _geom_angle_atom_site_label_2
 _geom_angle_site_symmetry_2
 _geom_angle_atom_site_label_3
 _geom_angle_site_symmetry_3
 _geom_angle
 _geom_angle_publ_flag
C10 . FE1 . C11 . 40.9(2)    no
C10 . FE1 . C12 . 68.7(2)    no
C11 . FE1 . C12 . 40.7(2)    no
C10 . FE1 . C13 . 69.0(2)    no
C11 . FE1 . C13 . 68.4(2)    no
C12 . FE1 . C13 . 40.2(2)    no
C10 . FE1 . C14 . 40.9(2)    no
C11 . FE1 . C14 . 68.3(2)    no
C12 . FE1 . C14 . 68.0(2)    no
C13 . FE1 . C14 . 40.9(2)    no
C10 . FE1 . C15 . 110.3(2)    no
C11 . FE1 . C15 . 116.8(2)    no
C12 . FE1 . C15 . 147.7(3)    no
C13 . FE1 . C15 . 171.8(3)    no
C14 . FE1 . C15 . 133.4(2)    no
C10 . FE1 . C16 . 133.0(3)    no
C11 . FE1 . C16 . 110.5(3)    no
C12 . FE1 . C16 . 116.8(3)    no
C13 . FE1 . C16 . 147.1(3)    no
C14 . FE1 . C16 . 171.7(3)    no
C10 . FE1 . C17 . 171.1(5)    no
C11 . FE1 . C17 . 132.9(5)    no
C12 . FE1 . C17 . 110.6(4)    no
C13 . FE1 . C17 . 116.6(3)    no
C14 . FE1 . C17 . 147.8(4)    no
C10 . FE1 . C18 . 149.2(6)    no
C11 . FE1 . C18 . 168.9(7)    no
C12 . FE1 . C18 . 130.3(6)    no
C13 . FE1 . C18 . 108.6(3)    no
C14 . FE1 . C18 . 116.9(4)    no
C10 . FE1 . C19 . 117.0(3)    no
C11 . FE1 . C19 . 148.4(4)    no
C12 . FE1 . C19 . 170.6(4)    no
C13 . FE1 . C19 . 132.9(3)    no
C14 . FE1 . C19 . 110.8(2)    no
C15 . FE1 . C16 . 39.1(3)    no
C15 . FE1 . C17 . 65.3(3)    no
C16 . FE1 . C17 . 38.8(4)    no
C15 . FE1 . C18 . 67.6(4)    no
C16 . FE1 . C18 . 65.8(4)    no
C17 . FE1 . C18 . 37.9(6)    no
C15 . FE1 . C19 . 39.6(3)    no
C16 . FE1 . C19 . 65.6(3)    no
C17 . FE1 . C19 . 65.1(5)    no
C18 . FE1 . C19 . 41.1(5)    no
C20 . FE2 . C21 . 41.1(2)    no
C20 . FE2 . C22 . 68.9(2)    no
C21 . FE2 . C22 . 40.8(2)    no
C20 . FE2 . C23 . 69.0(2)    no
C21 . FE2 . C23 . 68.6(2)    no
C22 . FE2 . C23 . 40.4(2)    no
C20 . FE2 . C24 . 41.2(2)    no
C21 . FE2 . C24 . 68.7(2)    no
C22 . FE2 . C24 . 68.3(2)    no
C23 . FE2 . C24 . 40.6(2)    no
C20 . FE2 . C25 . 124.1(2)    no
C21 . FE2 . C25 . 108.0(2)    no
C22 . FE2 . C25 . 122.4(2)    no
C23 . FE2 . C25 . 157.3(2)    no
C24 . FE2 . C25 . 161.0(2)    no
C20 . FE2 . C26 . 161.6(2)    no
C21 . FE2 . C26 . 125.8(2)    no
C22 . FE2 . C26 . 109.5(2)    no
C23 . FE2 . C26 . 122.5(2)    no
C24 . FE2 . C26 . 156.7(2)    no
C20 . FE2 . C27 . 154.8(2)    no
C21 . FE2 . C27 . 163.3(2)    no
C22 . FE2 . C27 . 126.4(2)    no
C23 . FE2 . C27 . 108.4(2)    no
C24 . FE2 . C27 . 120.5(2)    no
C20 . FE2 . C28 . 118.9(2)    no
C21 . FE2 . C28 . 154.8(2)    no
C22 . FE2 . C28 . 162.3(2)    no
C23 . FE2 . C28 . 124.7(2)    no
C24 . FE2 . C28 . 106.3(2)    no
C20 . FE2 . C29 . 105.4(2)    no
C21 . FE2 . C29 . 120.0(2)    no
C22 . FE2 . C29 . 156.4(2)    no
C23 . FE2 . C29 . 160.8(2)    no
C24 . FE2 . C29 . 123.4(2)    no
C25 . FE2 . C26 . 40.1(2)    no
C25 . FE2 . C27 . 68.0(2)    no
C26 . FE2 . C27 . 40.8(2)    no
C25 . FE2 . C28 . 68.2(2)    no
C26 . FE2 . C28 . 68.4(2)    no
C27 . FE2 . C28 . 40.6(2)    no
C25 . FE2 . C29 . 40.7(2)    no
C26 . FE2 . C29 . 68.2(2)    no
C27 . FE2 . C29 . 68.3(2)    no
C28 . FE2 . C29 . 40.7(2)    no
FE1 . C10 . C11 . 68.9(2)    no
FE1 . C10 . C14 . 69.1(2)    no
C11 . C10 . C14 . 106.5(4)    no
FE1 . C10 . C100 . 127.0(3)    no
C11 . C10 . C100 . 127.0(4)    no
C14 . C10 . C100 . 126.5(4)    no
FE1 . C11 . C10 . 70.2(2)    no
FE1 . C11 . C12 . 69.7(3)    no
C10 . C11 . C12 . 108.4(4)    no
FE1 . C11 . H11 . 125.9(4)    no
C10 . C11 . H11 . 125.8(5)    no
C12 . C11 . H11 . 125.8(5)    no
FE1 . C12 . C11 . 69.6(3)    no
FE1 . C12 . C13 . 70.2(3)    no
C11 . C12 . C13 . 108.8(4)    no
FE1 . C12 . H12 . 126.2(4)    no
C11 . C12 . H12 . 125.6(6)    no
C13 . C12 . H12 . 125.6(5)    no
FE1 . C13 . C12 . 69.6(3)    no
FE1 . C13 . C14 . 69.4(2)    no
C12 . C13 . C14 . 107.4(4)    no
FE1 . C13 . H13 . 126.3(4)    no
C12 . C13 . H13 . 126.3(5)    no
C14 . C13 . H13 . 126.3(5)    no
FE1 . C14 . C10 . 70.0(2)    no
FE1 . C14 . C13 . 69.8(2)    no
C10 . C14 . C13 . 108.8(4)    no
FE1 . C14 . H14 . 126.2(3)    no
C10 . C14 . H14 . 125.6(4)    no
C13 . C14 . H14 . 125.6(4)    no
FE1 . C15 . C16 . 70.2(3)    no
FE1 . C15 . C19 . 69.9(4)    no
C16 . C15 . C19 . 106.9(7)    no
FE1 . C15 . H15 . 125.0(4)    no
C16 . C15 . H15 . 126.5(9)    no
C19 . C15 . H15 . 126.5(9)    no
FE1 . C16 . C15 . 70.7(3)    no
FE1 . C16 . C17 . 70.1(4)    no
C15 . C16 . C17 . 108.1(9)    no
FE1 . C16 . H16 . 124.8(6)    no
C15 . C16 . H16 . 125.9(10)    no
C17 . C16 . H16 . 126.0(12)    no
FE1 . C17 . C16 . 71.2(4)    no
FE1 . C17 . C18 . 70.2(5)    no
C16 . C17 . C18 . 111.5(10)    no
FE1 . C17 . H17 . 126.0(8)    no
C16 . C17 . H17 . 124.3(17)    no
C18 . C17 . H17 . 124.3(17)    no
FE1 . C18 . C17 . 72.0(6)    no
FE1 . C18 . C19 . 70.7(5)    no
C17 . C18 . C19 . 106.5(8)    no
FE1 . C18 . H18 . 122.4(8)    no
C17 . C18 . H18 . 126.8(21)    no
C19 . C18 . H18 . 126.7(20)    no
FE1 . C19 . C15 . 70.5(4)    no
FE1 . C19 . C18 . 68.2(5)    no
C15 . C19 . C18 . 106.9(8)    no
FE1 . C19 . H19 . 126.3(5)    no
C15 . C19 . H19 . 126.5(12)    no
C18 . C19 . H19 . 126.6(14)    no
FE2 . C20 . C21 . 69.3(2)    no
FE2 . C20 . C24 . 69.2(2)    no
C21 . C20 . C24 . 106.7(3)    no
FE2 . C20 . C102 . 125.6(3)    no
C21 . C20 . C102 . 127.0(4)    no
C24 . C20 . C102 . 126.3(4)    no
FE2 . C21 . C20 . 69.7(2)    no
FE2 . C21 . C22 . 70.2(2)    no
C20 . C21 . C22 . 108.4(4)    no
FE2 . C21 . H21 . 125.9(3)    no
C20 . C21 . H21 . 125.8(4)    no
C22 . C21 . H21 . 125.8(4)    no
FE2 . C22 . C21 . 69.0(2)    no
FE2 . C22 . C23 . 69.8(3)    no
C21 . C22 . C23 . 108.2(4)    no
FE2 . C22 . H22 . 126.9(4)    no
C21 . C22 . H22 . 125.9(4)    no
C23 . C22 . H22 . 125.9(4)    no
FE2 . C23 . C22 . 69.8(2)    no
FE2 . C23 . C24 . 69.1(2)    no
C22 . C23 . C24 . 107.9(4)    no
FE2 . C23 . H23 . 126.6(4)    no
C22 . C23 . H23 . 126.0(4)    no
C24 . C23 . H23 . 126.0(4)    no
FE2 . C24 . C20 . 69.6(2)    no
FE2 . C24 . C23 . 70.3(2)    no
C20 . C24 . C23 . 108.8(4)    no
FE2 . C24 . H24 . 126.1(3)    no
C20 . C24 . H24 . 125.6(4)    no
C23 . C24 . H24 . 125.6(4)    no
FE2 . C25 . C26 . 69.8(3)    no
FE2 . C25 . C29 . 69.3(3)    no
C26 . C25 . C29 . 108.4(5)    no
FE2 . C25 . H25 . 126.7(4)    no
C26 . C25 . H25 . 125.8(5)    no
C29 . C25 . H25 . 125.8(5)    no
FE2 . C26 . C25 . 70.2(3)    no
FE2 . C26 . C27 . 69.2(3)    no
C25 . C26 . C27 . 107.9(5)    no
FE2 . C26 . H26 . 126.1(4)    no
C25 . C26 . H26 . 126.1(5)    no
C27 . C26 . H26 . 126.1(5)    no
FE2 . C27 . C26 . 69.9(3)    no
FE2 . C27 . C28 . 69.7(3)    no
C26 . C27 . C28 . 108.0(5)    no
FE2 . C27 . H27 . 126.0(4)    no
C26 . C27 . H27 . 126.0(6)    no
C28 . C27 . H27 . 126.0(6)    no
FE2 . C28 . C27 . 69.8(3)    no
FE2 . C28 . C29 . 69.9(3)    no
C27 . C28 . C29 . 108.2(5)    no
FE2 . C28 . H28 . 126.0(4)    no
C27 . C28 . H28 . 125.9(6)    no
C29 . C28 . H28 . 125.9(6)    no
FE2 . C29 . C25 . 70.0(3)    no
FE2 . C29 . C28 . 69.4(3)    no
C25 . C29 . C28 . 107.6(5)    no
FE2 . C29 . H29 . 125.9(4)    no
C25 . C29 . H29 . 126.2(6)    no
C28 . C29 . H29 . 126.2(6)    no
C10 . C100 . C101 . 121.9(4)    no
C10 . C100 . C105 . 119.9(4)    no
C101 . C100 . C105 . 118.2(4)    no
C100 . C101 . C102 . 122.2(4)    no
C100 . C101 . H101 . 118.9(4)    no
C102 . C101 . H101 . 118.9(4)    no
C20 . C102 . C101 . 122.0(4)    no
C20 . C102 . C103 . 119.1(4)    no
C101 . C102 . C103 . 118.9(4)    no
C102 . C103 . C104 . 118.6(4)    no
C102 . C103 . H103 . 120.7(4)    no
C104 . C103 . H103 . 120.7(4)    no
CL106 . C104 . C103 . 118.2(3)    no
CL106 . C104 . C105 . 119.0(3)    no
C103 . C104 . C105 . 122.9(4)    no
C100 . C105 . C104 . 119.3(4)    no
C100 . C105 . H105 . 120.4(4)    no
C104 . C105 . H105 . 120.4(4)    no


_audit_creation_date        97-O5-20
_audit_creation_method      CRYSTALS
#  Inorg. Chem. IC970013M
# 1. SUBMISSION DETAILS
_publ_contact_author
;
 J.P. Launay, CEMES, BP4347, 29 Rue J. Marvig, 31055, Toulouse (Fr)             
            
;
_publ_contact_author_phone                      ' (33) 5 62 25 78 32 '
_publ_contact_author_fax                        ' (33) 5 62 25 79 99 '
_publ_contact_author_email                      ' launay@cemes.fr '
_publ_requested_journal                         'Inorganic Chemistry'
_publ_contact_letter
;
   Please consider this CIF submission for the paper IC970013M, compound 5 (cn).
   The figures have been sent by mail, and structure factor listings 
   can be made available if requested.
;
#=============================================================================
# 2. PROCESSING SUMMARY (IUCr Office Use Only)
_journal_date_recd_electronic     ?
_journal_date_to_coeditor         ?
_journal_date_from_coeditor       ?
_journal_date_accepted            ?
_journal_date_printers_first      ?
_journal_date_printers_final      ?
_journal_date_proofs_out          ?
_journal_date_proofs_in           ?
_journal_coeditor_name            ?
_journal_coeditor_code            ?
_journal_coeditor_notes
;
                                  ?
;
_journal_techeditor_code          ?
_journal_techeditor_notes
;
                                  ?
;
_journal_coden_ASTM               ?
_journal_name_full                ?
_journal_year                     ?
_journal_volume                   ?
_journal_issue                    ?
_journal_page_first               ?
_journal_page_last                ?
_journal_suppl_publ_number        ?
_journal_suppl_publ_pages         ?
#=============================================================================
# 3. TITLE AND AUTHOR LIST
_publ_section_title
;
 Topological Effects on Intramolecular Electron Transfer via "Quantum 
 Interference". Manuscript IC90013M. Compound 5 (CN).
;
loop_
        _publ_author_name
        _publ_author_address
'Patoux, Cendrine'                               
;
CEMES, BP4347, 29 Rue J. Marvig, 31055, Toulouse (Fr)                         
;
'Coudret, Christophe'
;
CEMES, BP4347, 29 Rue J. Marvig, 31055, Toulouse (Fr)                         
;
'Launay, Jean-Pierre'
;
CEMES, BP4347, 29 Rue J. Marvig, 31055, Toulouse (Fr)                         
;
'Joachim, Christian'
;
CEMES, BP4347, 29 Rue J. Marvig, 31055, Toulouse (Fr)                         
;
'Gourdon, Andre'
;
CEMES, BP4347, 29 Rue J. Marvig, 31055, Toulouse (Fr)                         
;
#==============================================================================
# 4. TEXT
_publ_section_references
;
 
Altomare, A., Cascarano, G., Giacovazzo G., Guagliardi A., Burla M.C.,
Polidori, G.  & Camalli, M. (1994) SIR92 - a program for automatic solution of
crystal structures by direct methods. J. Appl. Cryst. (27), 435
 

Watkin, D.J., Prout, C.K. Carruthers, R.J. & Betteridge, P. (1996) CRYSTALS
Issue 10. Chemical Crystallography Laboratory, OXFORD, UK.
 
Watkin, D.J., Prout, C.K. & Pearce, L.J. (1996) CAMERON, Chemical
Crystallography Laboratory, OXFORD, UK.
 
Watkin, D.J., Prout, C.K., Lilley, P.M.deQ. (1994), RC93, Chemical
Crystallography Laboratory, Oxford, UK.
;
#==========================================================================
# Now, all the structure specific goodies
#==========================================================================
_computing_data_collection 'CAD-4 software (Enraf-Nonius, 1989)'
_computing_cell_refinement 'CAD-4 software (Enraf-Nonius, 1989)'
_computing_data_reduction
;
RC93 (Watkin, D.J., Prout, C.K., Lilley, P.M.deQ. 1994)
;
_computing_structure_refinement
;
CRYSTALS Issue 10 (Watkin, Prout, Carruthers & Betteridge, 1996)
;
_computing_publication_material
;
CRYSTALS Issue 10 (Watkin, Prout, Carruthers & Betteridge, 1996)
;
_computing_molecular_graphics
;
 CAMERON (Watkin, Prout & Pearce,  1996)
;
_computing_structure_solution 'SIR92 (Giacovazzo et al, 1992)'
_cell_length_a 12.702(1)
_cell_angle_alpha 109.50(1)
_cell_length_b 13.389(1)
_cell_angle_beta  90.77(1)
_cell_length_c 14.330(1)
_cell_angle_gamma 113.37(1)
_cell_volume  2078(4)
_symmetry_cell_setting 'Triclinic '
_symmetry_space_group_name_H-M 'P -1 '
loop_
 _symmetry_equiv_pos_as_xyz
 'x,y,z'
 '-x,-y,-z'
loop_
_atom_type_symbol
_atom_type_scat_dispersion_real
_atom_type_scat_dispersion_imag
_atom_type_scat_Cromer_Mann_a1
_atom_type_scat_Cromer_Mann_b1
_atom_type_scat_Cromer_Mann_a2
_atom_type_scat_Cromer_Mann_b2
_atom_type_scat_Cromer_Mann_a3
_atom_type_scat_Cromer_Mann_b3
_atom_type_scat_Cromer_Mann_a4
_atom_type_scat_Cromer_Mann_b4
_atom_type_scat_Cromer_Mann_c
_atom_type_scat_source
 'Fe  '    0.3010    0.8450   11.7695    4.7611
    7.3573    0.3072    3.5222   15.3535    2.3045   76.8805    1.0369
'International_Tables_Vol_IV_Table_2.2B'
 'C   '    0.0020    0.0020    2.3100   20.8439
    1.0200   10.2075    1.5886    0.5687    0.8650   51.6512    0.2156
'International_Tables_Vol_IV_Table_2.2B'
 'N   '    0.0040    0.0030   12.2126    0.0057
    3.1322    9.8933    2.0125   28.9975    1.1663    0.5826  -11.5290
'International_Tables_Vol_IV_Table_2.2B'
 'H   '    0.0000    0.0000    0.4930   10.5109
    0.3229   26.1257    0.1402    3.1424    0.0408   57.7997    0.0030
'International_Tables_Vol_IV_Table_2.2B'
_chemical_formula_sum
' C54 H42 Fe4 N2 '
_chemical_formula_moiety
' C54 H42 Fe4 N2 '
_chemical_formula_weight   942.33
_cell_measurement_reflns_used       25
_cell_measurement_theta_min       12
_cell_measurement_theta_max       13
_cell_measurement_temperature      293
_cell_formula_units_Z     4.00
_exptl_crystal_description ' prism '
_exptl_crystal_colour ' orange '
_exptl_crystal_size_min 0.3
_exptl_crystal_size_mid 0.7
_exptl_crystal_size_max 0.8
_exptl_crystal_density_diffrn 1.51
_exptl_crystal_density_meas ?
_exptl_crystal_F_000 970.45
_exptl_absorpt_coefficient_mu 1.41
_exptl_absorpt_correction_type NONE
_diffrn_standards_interval_time 3600
_diffrn_standards_number 2
_diffrn_standards_decay_% 5.91
_diffrn_ambient_temperature        24
_diffrn_reflns_number 6358
_reflns_number_total 5901
_diffrn_reflns_av_R_equivalents 0.01
_reflns_number_observed 4080
_diffrn_reflns_theta_min 2
_diffrn_reflns_theta_max 25.00
_diffrn_reflns_limit_h_min -15
_diffrn_reflns_limit_h_max 13
_diffrn_reflns_limit_k_min 0
_diffrn_reflns_limit_k_max 15
_diffrn_reflns_limit_l_min -17
_diffrn_reflns_limit_l_max 16
_reflns_limit_h_min -15
_reflns_limit_h_max 15
_reflns_limit_k_min -15
_reflns_limit_k_max 14
_reflns_limit_l_min 0
_reflns_limit_l_max 17
_reflns_observed_criterion  >3.00\s(I)
_refine_diff_density_min -0.79
_refine_diff_density_max 0.45
_refine_ls_number_reflns 4080
_refine_ls_number_parameters 541
_refine_ls_R_factor_obs 0.0417
_refine_ls_wR_factor_obs 0.0470
_refine_ls_goodness_of_fit_obs 0.6345
_refine_ls_shift/esd_max 0.126611
_refine_ls_abs_structure_details ' from Flack enantiopole 0.000'
_refine_ls_structure_factor_coef F
_diffrn_radiation_type       'Mo K\a'
_diffrn_radiation_wavelength      0.71069
 
 
# NOW ALL THE GOODIES TO BE ENTERED BY HAND
 
 
_diffrn_radiation_monochromator      graphite
_diffrn_measurement_device     '  Enraf-nonius CAD4 '
_diffrn_measurement_method 2\q/\w
_refine_ls_matrix_type                   full
_refine_ls_weighting_scheme
;
 unit
;
_atom_sites_solution_primary   Direct_Methods
_atom_sites_solution_hydrogens       Geometric
_refine_ls_hydrogen_treatment
;
 H atoms placed geometrically after each cycle
;
loop_
_atom_site_label
_atom_site_fract_x
_atom_site_fract_y
_atom_site_fract_z
_atom_site_U_iso_or_equiv
_atom_site_occupancy
_atom_site_thermal_displace_type
 FE1 0.43406(8) 0.28856(8) 0.27276(7) 0.0409 1.0000 Uani
 FE2 0.07507(8) 0.29891(8) 0.72726(7) 0.0393 1.0000 Uani
 C10 0.4264(5) 0.3111(5) 0.4203(4) 0.0343 1.0000 Uani
 C11 0.4040(6) 0.3969(6) 0.3956(5) 0.0433 1.0000 Uani
 C12 0.5002(6) 0.4628(6) 0.3609(5) 0.0487 1.0000 Uani
 C13 0.5833(7) 0.4191(7) 0.3641(6) 0.0575 1.0000 Uani
 C14 0.5381(6) 0.3254(6) 0.3993(5) 0.0451 1.0000 Uani
 C15 0.2893(9) 0.205(1) 0.1680(7) 0.0758 1.0000 Uani
 C16 0.3792(9) 0.2756(8) 0.1340(6) 0.0679 1.0000 Uani
 C17 0.469(1) 0.244(1) 0.1308(7) 0.0859 1.0000 Uani
 C18 0.430(2) 0.147(1) 0.1633(8) 0.0807 1.0000 Uani
 C19 0.321(1) 0.125(1) 0.1894(8) 0.0860 1.0000 Uani
 C20 0.0849(6) 0.1855(6) 0.5927(5) 0.0433 1.0000 Uani
 C21 0.0341(7) 0.2600(7) 0.5778(6) 0.0539 1.0000 Uani
 C22 -0.0670(7) 0.2369(8) 0.6216(6) 0.0582 1.0000 Uani
 C23 -0.0791(6) 0.1554(7) 0.6667(6) 0.0565 1.0000 Uani
 C24 0.0144(6) 0.1224(6) 0.6485(6) 0.0492 1.0000 Uani
 C25 0.2387(6) 0.4119(7) 0.8058(6) 0.0590 1.0000 Uani
 C26 0.1767(7) 0.4754(6) 0.7939(7) 0.0611 1.0000 Uani
 C27 0.0767(7) 0.4424(7) 0.8401(7) 0.0593 1.0000 Uani
 C28 0.0767(7) 0.3587(7) 0.8783(6) 0.0619 1.0000 Uani
 C29 0.1779(7) 0.3401(7) 0.8567(6) 0.0580 1.0000 Uani
 C100 0.3515(5) 0.2302(5) 0.4649(4) 0.0341 1.0000 Uani
 C101 0.2571(5) 0.2442(5) 0.5064(4) 0.0365 1.0000 Uani
 C102 0.1877(5) 0.1725(5) 0.5522(4) 0.0363 1.0000 Uani
 C103 0.2139(6) 0.0833(6) 0.5597(5) 0.0414 1.0000 Uani
 C104 0.3076(5) 0.0680(5) 0.5184(5) 0.0378 1.0000 Uani
 C105 0.3762(5) 0.1400(5) 0.4714(5) 0.0375 1.0000 Uani
 C106 0.3365(6) -0.0232(6) 0.5274(5) 0.0433 1.0000 Uani
 N107 0.3586(6) -0.0948(6) 0.5347(5) 0.0593 1.0000 Uani
 FE3 0.10471(8) 0.87795(8) 0.84830(8) 0.0417 1.0000 Uani
 FE4 -0.42065(8) 0.26671(8) 0.82965(7) 0.0375 1.0000 Uani
 C30 0.0260(6) 0.7107(5) 0.8469(5) 0.0393 1.0000 Uani
 C31 0.1440(6) 0.7411(6) 0.8296(6) 0.0488 1.0000 Uani
 C32 0.2173(7) 0.8379(7) 0.9143(7) 0.0557 1.0000 Uani
 C33 0.1497(7) 0.8714(7) 0.9821(6) 0.0600 1.0000 Uani
 C34 0.0314(7) 0.7927(6) 0.9415(5) 0.0542 1.0000 Uani
 C35 0.0102(8) 0.8946(8) 0.7444(8) 0.0664 1.0000 Uani
 C36 0.117(1) 0.907(1) 0.7176(8) 0.0797 1.0000 Uani
 C37 0.2026(8) 1.002(1) 0.796(1) 0.0716 1.0000 Uani
 C38 0.1470(9) 1.0483(7) 0.8719(9) 0.0736 1.0000 Uani
 C39 0.0279(8) 0.9816(7) 0.8392(8) 0.0697 1.0000 Uani
 C40 -0.3816(5) 0.4105(5) 0.7939(5) 0.0344 1.0000 Uani
 C41 -0.3946(6) 0.4361(6) 0.8964(5) 0.0432 1.0000 Uani
 C42 -0.5088(6) 0.3612(6) 0.9013(6) 0.0458 1.0000 Uani
 C43 -0.5663(6) 0.2897(6) 0.8010(6) 0.0481 1.0000 Uani
 C44 -0.4889(6) 0.3175(6) 0.7353(5) 0.0416 1.0000 Uani
 C45 -0.323(1) 0.2339(9) 0.9184(8) 0.0726 1.0000 Uani
 C46 -0.2786(8) 0.2328(9) 0.827(1) 0.0685 1.0000 Uani
 C47 -0.363(1) 0.148(1) 0.7470(7) 0.0665 1.0000 Uani
 C48 -0.4598(8) 0.0924(7) 0.7856(7) 0.0639 1.0000 Uani
 C49 -0.4337(9) 0.1444(8) 0.8887(7) 0.0589 1.0000 Uani
 C200 -0.0784(5) 0.6120(5) 0.7787(5) 0.0348 1.0000 Uani
 C201 -0.1781(5) 0.5607(5) 0.8156(4) 0.0359 1.0000 Uani
 C202 -0.2766(5) 0.4642(5) 0.7532(5) 0.0354 1.0000 Uani
 C203 -0.2729(5) 0.4189(6) 0.6517(5) 0.0410 1.0000 Uani
 C204 -0.1736(5) 0.4709(6) 0.6142(5) 0.0402 1.0000 Uani
 C205 -0.0769(5) 0.5672(6) 0.6771(5) 0.0418 1.0000 Uani
 C206 -0.1708(6) 0.4247(7) 0.5094(6) 0.0507 1.0000 Uani
 N207 -0.1658(6) 0.3898(7) 0.4259(5) 0.0710 1.0000 Uani
 H11 0.3323 0.4079 0.4020 0.0600 1.0000 Uiso
 H12 0.5077 0.5268 0.3388 0.0600 1.0000 Uiso
 H13 0.6603 0.4486 0.3450 0.0600 1.0000 Uiso
 H14 0.5780 0.2787 0.4075 0.0600 1.0000 Uiso
 H15 0.2150 0.2109 0.1760 0.0600 1.0000 Uiso
 H16 0.3788 0.3392 0.1149 0.0600 1.0000 Uiso
 H17 0.5438 0.2792 0.1105 0.0600 1.0000 Uiso
 H18 0.4743 0.1029 0.1667 0.0600 1.0000 Uiso
 H19 0.2752 0.0659 0.2168 0.0600 1.0000 Uiso
 H21 0.0644 0.3157 0.5439 0.0600 1.0000 Uiso
 H22 -0.1211 0.2724 0.6208 0.0600 1.0000 Uiso
 H23 -0.1408 0.1265 0.7041 0.0600 1.0000 Uiso
 H24 0.0280 0.0660 0.6705 0.0600 1.0000 Uiso
 H25 0.3122 0.4173 0.7823 0.0600 1.0000 Uiso
 H26 0.1985 0.5316 0.7600 0.0600 1.0000 Uiso
 H27 0.0178 0.4730 0.8446 0.0600 1.0000 Uiso
 H28 0.0176 0.3199 0.9134 0.0600 1.0000 Uiso
 H29 0.2009 0.2862 0.8746 0.0600 1.0000 Uiso
 H101 0.2395 0.3079 0.5028 0.0600 1.0000 Uiso
 H103 0.1671 0.0324 0.5936 0.0600 1.0000 Uiso
 H105 0.4417 0.1276 0.4430 0.0600 1.0000 Uiso
 H31 0.1690 0.7015 0.7694 0.0600 1.0000 Uiso
 H32 0.3025 0.8755 0.9238 0.0600 1.0000 Uiso
 H33 0.1783 0.9376 1.0465 0.0600 1.0000 Uiso
 H34 -0.0355 0.7951 0.9738 0.0600 1.0000 Uiso
 H35 -0.0655 0.8354 0.7042 0.0600 1.0000 Uiso
 H36 0.1316 0.8579 0.6554 0.0600 1.0000 Uiso
 H37 0.2869 1.0315 0.7982 0.0600 1.0000 Uiso
 H38 0.1848 1.1148 0.9354 0.0600 1.0000 Uiso
 H39 -0.0333 0.9933 0.8760 0.0600 1.0000 Uiso
 H41 -0.3346 0.4955 0.9541 0.0600 1.0000 Uiso
 H42 -0.5419 0.3593 0.9624 0.0600 1.0000 Uiso
 H43 -0.6471 0.2304 0.7810 0.0600 1.0000 Uiso
 H44 -0.5055 0.2798 0.6619 0.0600 1.0000 Uiso
 H45 -0.2830 0.2866 0.9870 0.0600 1.0000 Uiso
 H46 -0.2001 0.2843 0.8228 0.0600 1.0000 Uiso
 H47 -0.3569 0.1309 0.6759 0.0600 1.0000 Uiso
 H48 -0.5334 0.0275 0.7463 0.0600 1.0000 Uiso
 H49 -0.4864 0.1212 0.9345 0.0600 1.0000 Uiso
 H201 -0.1794 0.5932 0.8876 0.0600 1.0000 Uiso
 H203 -0.3401 0.3502 0.6064 0.0600 1.0000 Uiso
 H205 -0.0079 0.6034 0.6495 0.0600 1.0000 Uiso
loop_
_atom_site_aniso_label
_atom_site_aniso_U_11
_atom_site_aniso_U_22
_atom_site_aniso_U_33
_atom_site_aniso_U_23
_atom_site_aniso_U_13
_atom_site_aniso_U_12
 FE1 0.0525(6) 0.0397(5) 0.0338(5) 0.0117(4) 0.0070(4) 0.0221(5)
 FE2 0.0430(6) 0.0474(6) 0.0565(6) 0.0265(5) 0.0199(5) 0.0317(5)
 C10 0.039(4) 0.034(3) 0.028(3) 0.007(3) 0.007(3) 0.016(3)
 C11 0.058(4) 0.039(4) 0.038(4) 0.012(3) 0.011(3) 0.024(3)
 C12 0.057(5) 0.032(4) 0.057(5) 0.018(3) 0.007(4) 0.007(3)
 C13 0.048(5) 0.060(5) 0.064(5) 0.031(4) 0.011(4) 0.006(4)
 C14 0.038(4) 0.049(4) 0.053(4) 0.025(3) 0.007(3) 0.016(3)
 C15 0.076(7) 0.085(7) 0.057(6) 0.007(5) -0.022(5) 0.014(6)
 C16 0.111(8) 0.072(6) 0.047(5) 0.022(4) 0.012(5) 0.050(6)
 C17 0.14(1) 0.113(9) 0.057(6) 0.025(6) 0.040(6) 0.073(8)
 C18 0.24(2) 0.091(9) 0.062(7) -0.009(6) -0.012(9) 0.12(1)
 C19 0.17(1) 0.057(7) 0.053(6) 0.008(5) -0.033(8) -0.011(8)
 C20 0.043(4) 0.054(4) 0.044(4) 0.019(3) 0.011(3) 0.028(3)
 C21 0.064(5) 0.080(6) 0.070(5) 0.043(5) 0.019(4) 0.051(5)
 C22 0.053(5) 0.094(7) 0.067(5) 0.019(5) 0.007(4) 0.053(5)
 C23 0.032(4) 0.065(5) 0.084(6) 0.017(5) 0.014(4) 0.020(4)
 C24 0.040(4) 0.050(4) 0.066(5) 0.021(4) 0.016(4) 0.023(3)
 C25 0.048(5) 0.051(5) 0.087(6) 0.017(4) 0.015(4) 0.025(4)
 C26 0.075(6) 0.045(5) 0.104(7) 0.031(5) 0.038(5) 0.036(4)
 C27 0.068(5) 0.056(5) 0.088(6) 0.027(5) 0.032(5) 0.041(4)
 C28 0.064(5) 0.071(5) 0.060(5) 0.025(4) 0.025(4) 0.032(4)
 C29 0.066(5) 0.062(5) 0.059(5) 0.018(4) 0.009(4) 0.039(4)
 C100 0.038(3) 0.037(3) 0.025(3) 0.007(3) 0.001(3) 0.016(3)
 C101 0.045(4) 0.037(3) 0.034(3) 0.013(3) 0.007(3) 0.023(3)
 C102 0.041(4) 0.041(4) 0.030(3) 0.010(3) 0.002(3) 0.021(3)
 C103 0.045(4) 0.045(4) 0.044(4) 0.020(3) 0.014(3) 0.024(3)
 C104 0.041(4) 0.039(4) 0.040(4) 0.014(3) 0.006(3) 0.023(3)
 C105 0.037(4) 0.040(4) 0.038(3) 0.012(3) 0.005(3) 0.019(3)
 C106 0.041(4) 0.043(4) 0.054(4) 0.022(3) 0.014(3) 0.019(3)
 N107 0.063(4) 0.064(4) 0.102(5) 0.048(4) 0.026(4) 0.042(4)
 FE3 0.0386(5) 0.0311(5) 0.0593(6) 0.0195(5) 0.0067(5) 0.0106(4)
 FE4 0.0420(5) 0.0446(5) 0.0475(6) 0.0241(5) 0.0181(4) 0.0279(5)
 C30 0.045(4) 0.031(3) 0.043(4) 0.018(3) 0.002(3) 0.011(3)
 C31 0.044(4) 0.042(4) 0.073(5) 0.025(4) 0.001(4) 0.018(3)
 C32 0.050(5) 0.050(5) 0.080(6) 0.030(4) -0.021(4) 0.007(4)
 C33 0.070(6) 0.049(5) 0.046(5) 0.004(4) -0.010(4) 0.000(4)
 C34 0.061(5) 0.051(4) 0.041(4) 0.015(4) 0.009(4) 0.004(4)
 C35 0.066(6) 0.070(6) 0.103(7) 0.059(6) -0.002(5) 0.019(5)
 C36 0.13(1) 0.098(8) 0.093(8) 0.072(7) 0.048(7) 0.057(8)
 C37 0.053(6) 0.093(8) 0.18(1) 0.105(9) 0.035(7) 0.021(6)
 C38 0.082(7) 0.033(5) 0.15(1) 0.030(6) -0.015(7) 0.012(5)
 C39 0.071(6) 0.047(5) 0.131(9) 0.029(6) 0.009(6) 0.034(5)
 C40 0.037(3) 0.029(3) 0.041(4) 0.012(3) 0.007(3) 0.017(3)
 C41 0.050(4) 0.044(4) 0.043(4) 0.011(3) 0.016(3) 0.026(3)
 C42 0.052(4) 0.057(4) 0.061(5) 0.030(4) 0.031(4) 0.034(4)
 C43 0.040(4) 0.054(4) 0.086(6) 0.038(4) 0.017(4) 0.028(4)
 C44 0.039(4) 0.048(4) 0.046(4) 0.021(3) 0.005(3) 0.022(3)
 C45 0.103(8) 0.089(7) 0.091(7) 0.042(6) -0.004(6) 0.063(7)
 C46 0.053(6) 0.088(7) 0.17(1) 0.068(8) 0.037(7) 0.053(6)
 C47 0.118(9) 0.103(8) 0.082(7) 0.046(6) 0.053(6) 0.093(7)
 C48 0.090(7) 0.056(5) 0.081(6) 0.025(5) 0.022(5) 0.050(5)
 C49 0.108(8) 0.070(6) 0.073(6) 0.050(5) 0.038(5) 0.060(6)
 C200 0.037(4) 0.028(3) 0.045(4) 0.017(3) 0.004(3) 0.013(3)
 C201 0.041(4) 0.033(3) 0.038(4) 0.015(3) 0.010(3) 0.017(3)
 C202 0.036(4) 0.034(3) 0.041(4) 0.016(3) 0.005(3) 0.017(3)
 C203 0.038(4) 0.042(4) 0.041(4) 0.014(3) 0.006(3) 0.016(3)
 C204 0.037(4) 0.043(4) 0.036(4) 0.009(3) 0.005(3) 0.017(3)
 C205 0.038(4) 0.047(4) 0.048(4) 0.022(3) 0.012(3) 0.019(3)
 C206 0.033(4) 0.071(5) 0.047(4) 0.009(4) 0.009(3) 0.015(4)
 N207 0.048(4) 0.126(7) 0.049(4) 0.006(4) 0.016(3) 0.017(4)
_refine_ls_extinction_method
    'None'
loop_
 _geom_bond_atom_site_label_1
 _geom_bond_site_symmetry_1
 _geom_bond_atom_site_label_2
 _geom_bond_site_symmetry_2
 _geom_bond_distance
 _geom_bond_publ_flag
FE1 . C10 . 2.042(6)    no
FE1 . C11 . 2.025(6)    no
FE1 . C12 . 2.048(7)    no
FE1 . C13 . 2.034(8)    no
FE1 . C14 . 2.024(7)    no
FE1 . C15 . 2.015(8)    no
FE1 . C16 . 2.026(8)    no
FE1 . C17 . 2.028(9)    no
FE1 . C18 . 1.994(9)    no
FE1 . C19 . 2.00(1)    no
FE2 . C20 . 2.059(7)    no
FE2 . C21 . 2.034(8)    no
FE2 . C22 . 2.034(8)    no
FE2 . C23 . 2.033(7)    no
FE2 . C24 . 2.050(7)    no
FE2 . C25 . 2.045(8)    no
FE2 . C26 . 2.050(8)    no
FE2 . C27 . 2.049(8)    no
FE2 . C28 . 2.038(8)    no
FE2 . C29 . 2.033(8)    no
C10 . C11 . 1.433(8)    no
C10 . C14 . 1.405(8)    no
C10 . C100 . 1.466(8)    yes
C11 . C12 . 1.405(9)    no
C11 . H11 . 0.980(7)    no
C12 . C13 . 1.40(1)    no
C12 . H12 . 0.980(7)    no
C13 . C14 . 1.421(9)    no
C13 . H13 . 0.980(7)    no
C14 . H14 . 0.980(7)    no
C15 . C16 . 1.38(1)    no
C15 . C19 . 1.41(2)    no
C15 . H15 . 0.98(1)    no
C16 . C17 . 1.36(1)    no
C16 . H16 . 0.980(8)    no
C17 . C18 . 1.42(2)    no
C17 . H17 . 0.98(1)    no
C18 . C19 . 1.38(2)    no
C18 . H18 . 0.98(1)    no
C19 . H19 . 0.98(1)    no
C20 . C21 . 1.453(9)    no
C20 . C24 . 1.422(9)    no
C20 . C102 . 1.485(8)    yes
C21 . C22 . 1.40(1)    no
C21 . H21 . 0.980(7)    no
C22 . C23 . 1.40(1)    no
C22 . H22 . 0.980(7)    no
C23 . C24 . 1.422(9)    no
C23 . H23 . 0.980(8)    no
C24 . H24 . 0.980(7)    no
C25 . C26 . 1.41(1)    no
C25 . C29 . 1.39(1)    no
C25 . H25 . 0.980(7)    no
C26 . C27 . 1.42(1)    no
C26 . H26 . 0.980(8)    no
C27 . C28 . 1.40(1)    no
C27 . H27 . 0.980(7)    no
C28 . C29 . 1.42(1)    no
C28 . H28 . 0.980(8)    no
C29 . H29 . 0.980(7)    no
C100 . C101 . 1.396(8)    no
C100 . C105 . 1.392(8)    no
C101 . C102 . 1.375(8)    no
C101 . H101 . 0.980(6)    no
C102 . C103 . 1.396(8)    no
C103 . C104 . 1.394(8)    no
C103 . H103 . 0.980(6)    no
C104 . C105 . 1.387(8)    no
C104 . C106 . 1.451(9)    no
C105 . H105 . 0.980(6)    no
C106 . N107 . 1.135(8)    no
FE3 . C30 . 2.051(6)    no
FE3 . C31 . 2.019(7)    no
FE3 . C32 . 2.035(7)    no
FE3 . C33 . 2.032(8)    no
FE3 . C34 . 2.039(7)    no
FE3 . C35 . 2.022(8)    no
FE3 . C36 . 2.030(9)    no
FE3 . C37 . 2.019(8)    no
FE3 . C38 . 2.028(8)    no
FE3 . C39 . 2.021(8)    no
FE4 . C40 . 2.031(6)    no
FE4 . C41 . 2.029(6)    no
FE4 . C42 . 2.049(6)    no
FE4 . C43 . 2.050(6)    no
FE4 . C44 . 2.023(6)    no
FE4 . C45 . 2.030(8)    no
FE4 . C46 . 2.026(8)    no
FE4 . C47 . 2.032(8)    no
FE4 . C48 . 2.044(8)    no
FE4 . C49 . 2.034(7)    no
C30 . C31 . 1.439(9)    no
C30 . C34 . 1.411(9)    no
C30 . C200 . 1.474(8)    yes
C31 . C32 . 1.41(1)    no
C31 . H31 . 0.980(8)    no
C32 . C33 . 1.39(1)    no
C32 . H32 . 0.980(8)    no
C33 . C34 . 1.42(1)    no
C33 . H33 . 0.980(7)    no
C34 . H34 . 0.980(8)    no
C35 . C36 . 1.38(1)    no
C35 . C39 . 1.41(1)    no
C35 . H35 . 0.980(9)    no
C36 . C37 . 1.41(1)    no
C36 . H36 . 0.98(1)    no
C37 . C38 . 1.40(1)    no
C37 . H37 . 0.980(9)    no
C38 . C39 . 1.39(1)    no
C38 . H38 . 0.98(1)    no
C39 . H39 . 0.98(1)    no
C40 . C41 . 1.420(8)    no
C40 . C44 . 1.428(8)    no
C40 . C202 . 1.475(8)    yes
C41 . C42 . 1.419(9)    no
C41 . H41 . 0.980(7)    no
C42 . C43 . 1.42(1)    no
C42 . H42 . 0.980(7)    no
C43 . C44 . 1.400(9)    no
C43 . H43 . 0.980(7)    no
C44 . H44 . 0.980(7)    no
C45 . C46 . 1.42(1)    no
C45 . C49 . 1.38(1)    no
C45 . H45 . 0.98(1)    no
C46 . C47 . 1.38(1)    no
C46 . H46 . 0.980(9)    no
C47 . C48 . 1.39(1)    no
C47 . H47 . 0.980(9)    no
C48 . C49 . 1.38(1)    no
C48 . H48 . 0.980(9)    no
C49 . H49 . 0.980(8)    no
C200 . C201 . 1.387(8)    no
C200 . C205 . 1.382(9)    no
C201 . C202 . 1.397(8)    no
C201 . H201 . 0.980(6)    no
C202 . C203 . 1.386(8)    no
C203 . C204 . 1.391(9)    no
C203 . H203 . 0.980(6)    no
C204 . C205 . 1.386(9)    no
C204 . C206 . 1.429(9)    no
C205 . H205 . 0.980(6)    no
C206 . N207 . 1.142(9)    no
loop_
 _geom_angle_atom_site_label_1
 _geom_angle_site_symmetry_1
 _geom_angle_atom_site_label_2
 _geom_angle_site_symmetry_2
 _geom_angle_atom_site_label_3
 _geom_angle_site_symmetry_3
 _geom_angle
 _geom_angle_publ_flag
C10 . FE1 . C11 . 41.2(2)    no
C10 . FE1 . C12 . 69.2(3)    no
C11 . FE1 . C12 . 40.4(3)    no
C10 . FE1 . C13 . 68.4(3)    no
C11 . FE1 . C13 . 67.3(3)    no
C12 . FE1 . C13 . 40.1(3)    no
C10 . FE1 . C14 . 40.4(2)    no
C11 . FE1 . C14 . 68.1(3)    no
C12 . FE1 . C14 . 68.8(3)    no
C13 . FE1 . C14 . 41.0(3)    no
C10 . FE1 . C15 . 121.8(4)    no
C11 . FE1 . C15 . 107.8(4)    no
C12 . FE1 . C15 . 123.5(4)    no
C13 . FE1 . C15 . 159.9(4)    no
C14 . FE1 . C15 . 157.4(4)    no
C10 . FE1 . C16 . 155.7(3)    no
C11 . FE1 . C16 . 119.8(3)    no
C12 . FE1 . C16 . 106.0(3)    no
C13 . FE1 . C16 . 124.1(4)    no
C14 . FE1 . C16 . 161.9(4)    no
C10 . FE1 . C17 . 164.2(4)    no
C11 . FE1 . C17 . 152.7(4)    no
C12 . FE1 . C17 . 118.1(4)    no
C13 . FE1 . C17 . 107.5(4)    no
C14 . FE1 . C17 . 126.6(4)    no
C10 . FE1 . C18 . 127.0(4)    no
C11 . FE1 . C18 . 163.6(6)    no
C12 . FE1 . C18 . 155.7(6)    no
C13 . FE1 . C18 . 123.2(6)    no
C14 . FE1 . C18 . 110.5(4)    no
C10 . FE1 . C19 . 107.8(4)    no
C11 . FE1 . C19 . 125.2(5)    no
C12 . FE1 . C19 . 161.0(6)    no
C13 . FE1 . C19 . 157.7(6)    no
C14 . FE1 . C19 . 121.8(4)    no
C15 . FE1 . C16 . 39.8(4)    no
C15 . FE1 . C17 . 67.4(4)    no
C16 . FE1 . C17 . 39.2(4)    no
C15 . FE1 . C18 . 66.8(5)    no
C16 . FE1 . C18 . 66.7(4)    no
C17 . FE1 . C18 . 41.5(5)    no
C15 . FE1 . C19 . 41.0(5)    no
C16 . FE1 . C19 . 68.6(4)    no
C17 . FE1 . C19 . 69.9(5)    no
C18 . FE1 . C19 . 40.5(5)    no
C20 . FE2 . C21 . 41.6(3)    no
C20 . FE2 . C22 . 68.1(3)    no
C21 . FE2 . C22 . 40.4(3)    no
C20 . FE2 . C23 . 68.5(3)    no
C21 . FE2 . C23 . 68.9(3)    no
C22 . FE2 . C23 . 40.4(3)    no
C20 . FE2 . C24 . 40.5(3)    no
C21 . FE2 . C24 . 69.1(3)    no
C22 . FE2 . C24 . 67.9(3)    no
C23 . FE2 . C24 . 40.7(3)    no
C20 . FE2 . C25 . 109.9(3)    no
C21 . FE2 . C25 . 121.8(3)    no
C22 . FE2 . C25 . 156.0(4)    no
C23 . FE2 . C25 . 163.1(3)    no
C24 . FE2 . C25 . 127.2(3)    no
C20 . FE2 . C26 . 127.5(3)    no
C21 . FE2 . C26 . 108.1(3)    no
C22 . FE2 . C26 . 120.4(4)    no
C23 . FE2 . C26 . 153.8(3)    no
C24 . FE2 . C26 . 164.6(3)    no
C20 . FE2 . C27 . 164.2(3)    no
C21 . FE2 . C27 . 125.3(3)    no
C22 . FE2 . C27 . 107.3(3)    no
C23 . FE2 . C27 . 118.5(3)    no
C24 . FE2 . C27 . 153.4(3)    no
C20 . FE2 . C28 . 155.0(3)    no
C21 . FE2 . C28 . 161.3(3)    no
C22 . FE2 . C28 . 124.4(3)    no
C23 . FE2 . C28 . 106.0(3)    no
C24 . FE2 . C28 . 119.4(3)    no
C20 . FE2 . C29 . 121.2(3)    no
C21 . FE2 . C29 . 156.4(3)    no
C22 . FE2 . C29 . 162.1(4)    no
C23 . FE2 . C29 . 125.3(4)    no
C24 . FE2 . C29 . 108.2(3)    no
C25 . FE2 . C26 . 40.4(3)    no
C25 . FE2 . C27 . 67.7(3)    no
C26 . FE2 . C27 . 40.6(3)    no
C25 . FE2 . C28 . 68.0(3)    no
C26 . FE2 . C28 . 68.2(3)    no
C27 . FE2 . C28 . 40.1(3)    no
C25 . FE2 . C29 . 40.0(3)    no
C26 . FE2 . C29 . 67.9(3)    no
C27 . FE2 . C29 . 67.8(3)    no
C28 . FE2 . C29 . 40.9(3)    no
FE1 . C10 . C11 . 68.7(3)    no
FE1 . C10 . C14 . 69.1(4)    no
C11 . C10 . C14 . 106.1(5)    no
FE1 . C10 . C100 . 129.8(4)    no
C11 . C10 . C100 . 127.0(6)    no
C14 . C10 . C100 . 126.8(6)    no
FE1 . C11 . C10 . 70.0(3)    no
FE1 . C11 . C12 . 70.7(4)    no
C10 . C11 . C12 . 109.9(6)    no
FE1 . C11 . H11 . 125.8(5)    no
C10 . C11 . H11 . 125.1(6)    no
C12 . C11 . H11 . 125.1(7)    no
FE1 . C12 . C11 . 69.0(4)    no
FE1 . C12 . C13 . 69.4(4)    no
C11 . C12 . C13 . 106.5(6)    no
FE1 . C12 . H12 . 126.5(6)    no
C11 . C12 . H12 . 126.7(7)    no
C13 . C12 . H12 . 126.7(7)    no
FE1 . C13 . C12 . 70.4(4)    no
FE1 . C13 . C14 . 69.1(4)    no
C12 . C13 . C14 . 109.2(6)    no
FE1 . C13 . H13 . 126.6(6)    no
C12 . C13 . H13 . 125.4(7)    no
C14 . C13 . H13 . 125.4(8)    no
FE1 . C14 . C10 . 70.5(4)    no
FE1 . C14 . C13 . 69.9(4)    no
C10 . C14 . C13 . 108.3(6)    no
FE1 . C14 . H14 . 125.4(5)    no
C10 . C14 . H14 . 125.8(6)    no
C13 . C14 . H14 . 125.8(7)    no
FE1 . C15 . C16 . 70.5(5)    no
FE1 . C15 . C19 . 69.0(6)    no
C16 . C15 . C19 . 109.4(10)    no
FE1 . C15 . H15 . 126.7(7)    no
C16 . C15 . H15 . 125.3(12)    no
C19 . C15 . H15 . 125.3(14)    no
FE1 . C16 . C15 . 69.7(5)    no
FE1 . C16 . C17 . 70.4(5)    no
C15 . C16 . C17 . 110.1(9)    no
FE1 . C16 . H16 . 126.5(7)    no
C15 . C16 . H16 . 125.0(11)    no
C17 . C16 . H16 . 125.0(11)    no
FE1 . C17 . C16 . 70.3(5)    no
FE1 . C17 . C18 . 68.0(5)    no
C16 . C17 . C18 . 105.1(10)    no
FE1 . C17 . H17 . 125.8(8)    no
C16 . C17 . H17 . 127.4(12)    no
C18 . C17 . H17 . 127.4(14)    no
FE1 . C18 . C17 . 70.5(5)    no
FE1 . C18 . C19 . 70.1(6)    no
C17 . C18 . C19 . 110.8(10)    no
FE1 . C18 . H18 . 126.4(9)    no
C17 . C18 . H18 . 124.6(18)    no
C19 . C18 . H18 . 124.6(18)    no
FE1 . C19 . C15 . 70.0(6)    no
FE1 . C19 . C18 . 69.5(6)    no
C15 . C19 . C18 . 104.6(10)    no
FE1 . C19 . H19 . 124.5(8)    no
C15 . C19 . H19 . 127.7(19)    no
C18 . C19 . H19 . 127.7(19)    no
FE2 . C20 . C21 . 68.3(4)    no
FE2 . C20 . C24 . 69.4(4)    no
C21 . C20 . C24 . 107.4(6)    no
FE2 . C20 . C102 . 130.1(5)    no
C21 . C20 . C102 . 126.2(6)    no
C24 . C20 . C102 . 126.3(6)    no
FE2 . C21 . C20 . 70.2(4)    no
FE2 . C21 . C22 . 69.8(4)    no
C20 . C21 . C22 . 106.7(6)    no
FE2 . C21 . H21 . 125.0(7)    no
C20 . C21 . H21 . 126.7(7)    no
C22 . C21 . H21 . 126.7(7)    no
FE2 . C22 . C21 . 69.8(4)    no
FE2 . C22 . C23 . 69.8(4)    no
C21 . C22 . C23 . 110.0(6)    no
FE2 . C22 . H22 . 127.0(6)    no
C21 . C22 . H22 . 125.0(9)    no
C23 . C22 . H22 . 125.0(8)    no
FE2 . C23 . C22 . 69.8(5)    no
FE2 . C23 . C24 . 70.3(4)    no
C22 . C23 . C24 . 107.7(7)    no
FE2 . C23 . H23 . 125.4(6)    no
C22 . C23 . H23 . 126.2(7)    no
C24 . C23 . H23 . 126.2(8)    no
FE2 . C24 . C20 . 70.1(4)    no
FE2 . C24 . C23 . 69.0(4)    no
C20 . C24 . C23 . 108.2(6)    no
FE2 . C24 . H24 . 126.6(6)    no
C20 . C24 . H24 . 125.9(6)    no
C23 . C24 . H24 . 125.9(7)    no
FE2 . C25 . C26 . 70.0(5)    no
FE2 . C25 . C29 . 69.5(4)    no
C26 . C25 . C29 . 108.6(7)    no
FE2 . C25 . H25 . 126.4(6)    no
C26 . C25 . H25 . 125.7(8)    no
C29 . C25 . H25 . 125.7(8)    no
FE2 . C26 . C25 . 69.6(4)    no
FE2 . C26 . C27 . 69.7(4)    no
C25 . C26 . C27 . 107.1(7)    no
FE2 . C26 . H26 . 125.8(7)    no
C25 . C26 . H26 . 126.4(8)    no
C27 . C26 . H26 . 126.4(8)    no
FE2 . C27 . C26 . 69.7(4)    no
FE2 . C27 . C28 . 69.5(4)    no
C26 . C27 . C28 . 108.5(7)    no
FE2 . C27 . H27 . 126.6(7)    no
C26 . C27 . H27 . 125.7(8)    no
C28 . C27 . H27 . 125.7(8)    no
FE2 . C28 . C27 . 70.4(5)    no
FE2 . C28 . C29 . 69.3(4)    no
C27 . C28 . C29 . 107.5(7)    no
FE2 . C28 . H28 . 125.6(6)    no
C27 . C28 . H28 . 126.2(8)    no
C29 . C28 . H28 . 126.2(8)    no
FE2 . C29 . C25 . 70.5(5)    no
FE2 . C29 . C28 . 69.8(5)    no
C25 . C29 . C28 . 108.3(7)    no
FE2 . C29 . H29 . 125.5(6)    no
C25 . C29 . H29 . 125.9(8)    no
C28 . C29 . H29 . 125.9(8)    no
C10 . C100 . C101 . 121.5(5)    no
C10 . C100 . C105 . 120.6(5)    no
C101 . C100 . C105 . 117.9(6)    no
C100 . C101 . C102 . 122.9(6)    no
C100 . C101 . H101 . 118.5(6)    no
C102 . C101 . H101 . 118.5(6)    no
C20 . C102 . C101 . 122.5(6)    no
C20 . C102 . C103 . 118.6(6)    no
C101 . C102 . C103 . 118.9(6)    no
C102 . C103 . C104 . 118.9(6)    no
C102 . C103 . H103 . 120.6(6)    no
C104 . C103 . H103 . 120.6(6)    no
C103 . C104 . C105 . 121.7(6)    no
C103 . C104 . C106 . 119.2(6)    no
C105 . C104 . C106 . 119.1(6)    no
C100 . C105 . C104 . 119.7(6)    no
C100 . C105 . H105 . 120.2(6)    no
C104 . C105 . H105 . 120.2(6)    no
C104 . C106 . N107 . 179.6(7)    no
C30 . FE3 . C31 . 41.4(3)    no
C30 . FE3 . C32 . 68.6(3)    no
C31 . FE3 . C32 . 40.6(3)    no
C30 . FE3 . C33 . 68.7(3)    no
C31 . FE3 . C33 . 68.3(3)    no
C32 . FE3 . C33 . 39.9(3)    no
C30 . FE3 . C34 . 40.4(3)    no
C31 . FE3 . C34 . 68.4(3)    no
C32 . FE3 . C34 . 67.7(3)    no
C33 . FE3 . C34 . 40.8(3)    no
C30 . FE3 . C35 . 109.4(3)    no
C31 . FE3 . C35 . 126.1(4)    no
C32 . FE3 . C35 . 162.2(4)    no
C33 . FE3 . C35 . 157.4(4)    no
C34 . FE3 . C35 . 123.0(3)    no
C30 . FE3 . C36 . 120.4(4)    no
C31 . FE3 . C36 . 106.7(4)    no
C32 . FE3 . C36 . 124.7(4)    no
C33 . FE3 . C36 . 161.1(4)    no
C34 . FE3 . C36 . 156.1(4)    no
C30 . FE3 . C37 . 154.7(5)    no
C31 . FE3 . C37 . 118.5(4)    no
C32 . FE3 . C37 . 106.3(4)    no
C33 . FE3 . C37 . 124.2(4)    no
C34 . FE3 . C37 . 162.6(5)    no
C30 . FE3 . C38 . 163.9(4)    no
C31 . FE3 . C38 . 153.1(4)    no
C32 . FE3 . C38 . 118.8(4)    no
C33 . FE3 . C38 . 107.1(4)    no
C34 . FE3 . C38 . 126.5(4)    no
C30 . FE3 . C39 . 127.7(3)    no
C31 . FE3 . C39 . 164.6(3)    no
C32 . FE3 . C39 . 154.3(4)    no
C33 . FE3 . C39 . 121.4(4)    no
C34 . FE3 . C39 . 110.3(4)    no
C35 . FE3 . C36 . 39.9(4)    no
C35 . FE3 . C37 . 67.5(4)    no
C36 . FE3 . C37 . 40.7(4)    no
C35 . FE3 . C38 . 68.2(4)    no
C36 . FE3 . C38 . 68.7(4)    no
C37 . FE3 . C38 . 40.6(4)    no
C35 . FE3 . C39 . 40.7(4)    no
C36 . FE3 . C39 . 68.0(4)    no
C37 . FE3 . C39 . 67.5(4)    no
C38 . FE3 . C39 . 40.2(4)    no
C40 . FE4 . C41 . 41.0(2)    no
C40 . FE4 . C42 . 68.8(3)    no
C41 . FE4 . C42 . 40.7(3)    no
C40 . FE4 . C43 . 68.2(3)    no
C41 . FE4 . C43 . 68.0(3)    no
C42 . FE4 . C43 . 40.5(3)    no
C40 . FE4 . C44 . 41.2(2)    no
C41 . FE4 . C44 . 68.9(3)    no
C42 . FE4 . C44 . 68.6(3)    no
C43 . FE4 . C44 . 40.2(3)    no
C40 . FE4 . C45 . 129.7(4)    no
C41 . FE4 . C45 . 108.0(3)    no
C42 . FE4 . C45 . 116.4(4)    no
C43 . FE4 . C45 . 149.5(4)    no
C44 . FE4 . C45 . 169.1(4)    no
C40 . FE4 . C46 . 108.3(3)    no
C41 . FE4 . C46 . 117.2(4)    no
C42 . FE4 . C46 . 149.9(5)    no
C43 . FE4 . C46 . 168.4(5)    no
C44 . FE4 . C46 . 130.1(4)    no
C40 . FE4 . C47 . 116.3(3)    no
C41 . FE4 . C47 . 149.0(4)    no
C42 . FE4 . C47 . 169.3(4)    no
C43 . FE4 . C47 . 130.8(4)    no
C44 . FE4 . C47 . 108.4(3)    no
C40 . FE4 . C48 . 149.3(3)    no
C41 . FE4 . C48 . 169.3(3)    no
C42 . FE4 . C48 . 131.4(3)    no
C43 . FE4 . C48 . 110.5(3)    no
C44 . FE4 . C48 . 117.3(3)    no
C40 . FE4 . C49 . 168.7(3)    no
C41 . FE4 . C49 . 131.1(3)    no
C42 . FE4 . C49 . 110.3(3)    no
C43 . FE4 . C49 . 118.9(3)    no
C44 . FE4 . C49 . 149.8(4)    no
C45 . FE4 . C46 . 41.1(4)    no
C45 . FE4 . C47 . 68.5(4)    no
C46 . FE4 . C47 . 39.7(4)    no
C45 . FE4 . C48 . 67.6(4)    no
C46 . FE4 . C48 . 66.4(4)    no
C47 . FE4 . C48 . 39.9(4)    no
C45 . FE4 . C49 . 39.7(4)    no
C46 . FE4 . C49 . 66.4(4)    no
C47 . FE4 . C49 . 66.7(3)    no
C48 . FE4 . C49 . 39.4(3)    no
FE3 . C30 . C31 . 68.1(4)    no
FE3 . C30 . C34 . 69.4(4)    no
C31 . C30 . C34 . 106.3(6)    no
FE3 . C30 . C200 . 127.8(4)    no
C31 . C30 . C200 . 126.0(6)    no
C34 . C30 . C200 . 127.7(6)    no
FE3 . C31 . C30 . 70.5(4)    no
FE3 . C31 . C32 . 70.3(4)    no
C30 . C31 . C32 . 107.9(7)    no
FE3 . C31 . H31 . 124.8(5)    no
C30 . C31 . H31 . 126.0(7)    no
C32 . C31 . H31 . 126.0(7)    no
FE3 . C32 . C31 . 69.1(4)    no
FE3 . C32 . C33 . 70.0(5)    no
C31 . C32 . C33 . 109.0(7)    no
FE3 . C32 . H32 . 127.0(6)    no
C31 . C32 . H32 . 125.5(9)    no
C33 . C32 . H32 . 125.5(8)    no
FE3 . C33 . C32 . 70.2(4)    no
FE3 . C33 . C34 . 69.9(4)    no
C32 . C33 . C34 . 107.9(7)    no
FE3 . C33 . H33 . 125.5(7)    no
C32 . C33 . H33 . 126.1(8)    no
C34 . C33 . H33 . 126.1(9)    no
FE3 . C34 . C30 . 70.3(4)    no
FE3 . C34 . C33 . 69.3(4)    no
C30 . C34 . C33 . 108.9(7)    no
FE3 . C34 . H34 . 126.4(6)    no
C30 . C34 . H34 . 125.6(7)    no
C33 . C34 . H34 . 125.6(7)    no
FE3 . C35 . C36 . 70.4(5)    no
FE3 . C35 . C39 . 69.6(5)    no
C36 . C35 . C39 . 108.6(9)    no
FE3 . C35 . H35 . 125.9(6)    no
C36 . C35 . H35 . 125.7(12)    no
C39 . C35 . H35 . 125.7(11)    no
FE3 . C36 . C35 . 69.8(5)    no
FE3 . C36 . C37 . 69.2(5)    no
C35 . C36 . C37 . 107.1(9)    no
FE3 . C36 . H36 . 126.2(7)    no
C35 . C36 . H36 . 126.4(13)    no
C37 . C36 . H36 . 126.4(13)    no
FE3 . C37 . C36 . 70.1(5)    no
FE3 . C37 . C38 . 70.0(5)    no
C36 . C37 . C38 . 108.9(8)    no
FE3 . C37 . H37 . 125.9(7)    no
C36 . C37 . H37 . 125.6(15)    no
C38 . C37 . H37 . 125.6(14)    no
FE3 . C38 . C37 . 69.3(5)    no
FE3 . C38 . C39 . 69.7(5)    no
C37 . C38 . C39 . 106.9(9)    no
FE3 . C38 . H38 . 126.0(8)    no
C37 . C38 . H38 . 126.5(12)    no
C39 . C38 . H38 . 126.5(13)    no
FE3 . C39 . C35 . 69.7(5)    no
FE3 . C39 . C38 . 70.2(5)    no
C35 . C39 . C38 . 108.5(9)    no
FE3 . C39 . H39 . 126.0(7)    no
C35 . C39 . H39 . 125.7(10)    no
C38 . C39 . H39 . 125.7(11)    no
FE4 . C40 . C41 . 69.4(4)    no
FE4 . C40 . C44 . 69.1(3)    no
C41 . C40 . C44 . 107.2(5)    no
FE4 . C40 . C202 . 124.5(4)    no
C41 . C40 . C202 . 127.6(6)    no
C44 . C40 . C202 . 125.1(6)    no
FE4 . C41 . C40 . 69.6(3)    no
FE4 . C41 . C42 . 70.4(4)    no
C40 . C41 . C42 . 108.6(6)    no
FE4 . C41 . H41 . 125.9(5)    no
C40 . C41 . H41 . 125.7(6)    no
C42 . C41 . H41 . 125.7(6)    no
FE4 . C42 . C41 . 68.9(4)    no
FE4 . C42 . C43 . 69.8(4)    no
C41 . C42 . C43 . 107.1(6)    no
FE4 . C42 . H42 . 126.5(5)    no
C41 . C42 . H42 . 126.5(7)    no
C43 . C42 . H42 . 126.5(7)    no
FE4 . C43 . C42 . 69.7(4)    no
FE4 . C43 . C44 . 68.9(4)    no
C42 . C43 . C44 . 109.0(6)    no
FE4 . C43 . H43 . 127.5(5)    no
C42 . C43 . H43 . 125.5(7)    no
C44 . C43 . H43 . 125.5(8)    no
FE4 . C44 . C40 . 69.7(3)    no
FE4 . C44 . C43 . 70.9(4)    no
C40 . C44 . C43 . 108.1(6)    no
FE4 . C44 . H44 . 125.0(5)    no
C40 . C44 . H44 . 126.0(6)    no
C43 . C44 . H44 . 126.0(7)    no
FE4 . C45 . C46 . 69.3(5)    no
FE4 . C45 . C49 . 70.3(5)    no
C46 . C45 . C49 . 104.8(9)    no
FE4 . C45 . H45 . 124.5(7)    no
C46 . C45 . H45 . 127.6(13)    no
C49 . C45 . H45 . 127.6(12)    no
FE4 . C46 . C45 . 69.6(5)    no
FE4 . C46 . C47 . 70.4(5)    no
C45 . C46 . C47 . 109.5(9)    no
FE4 . C46 . H46 . 126.3(7)    no
C45 . C46 . H46 . 125.3(14)    no
C47 . C46 . H46 . 125.3(14)    no
FE4 . C47 . C46 . 69.9(5)    no
FE4 . C47 . C48 . 70.5(5)    no
C46 . C47 . C48 . 107.3(9)    no
FE4 . C47 . H47 . 124.8(7)    no
C46 . C47 . H47 . 126.3(12)    no
C48 . C47 . H47 . 126.3(12)    no
FE4 . C48 . C47 . 69.6(5)    no
FE4 . C48 . C49 . 69.9(5)    no
C47 . C48 . C49 . 107.9(9)    no
FE4 . C48 . H48 . 126.1(6)    no
C47 . C48 . H48 . 126.1(10)    no
C49 . C48 . H48 . 126.1(10)    no
FE4 . C49 . C45 . 70.0(5)    no
FE4 . C49 . C48 . 70.7(5)    no
C45 . C49 . C48 . 110.5(8)    no
FE4 . C49 . H49 . 126.2(6)    no
C45 . C49 . H49 . 124.8(10)    no
C48 . C49 . H49 . 124.8(11)    no
C30 . C200 . C201 . 120.8(6)    no
C30 . C200 . C205 . 120.1(6)    no
C201 . C200 . C205 . 119.1(6)    no
C200 . C201 . C202 . 121.9(6)    no
C200 . C201 . H201 . 119.0(6)    no
C202 . C201 . H201 . 119.0(6)    no
C40 . C202 . C201 . 121.1(5)    no
C40 . C202 . C203 . 120.6(6)    no
C201 . C202 . C203 . 118.2(6)    no
C202 . C203 . C204 . 120.0(6)    no
C202 . C203 . H203 . 120.0(6)    no
C204 . C203 . H203 . 120.0(6)    no
C203 . C204 . C205 . 121.0(6)    no
C203 . C204 . C206 . 119.7(6)    no
C205 . C204 . C206 . 119.2(6)    no
C200 . C205 . C204 . 119.7(6)    no
C200 . C205 . H205 . 120.2(6)    no
C204 . C205 . H205 . 120.2(6)    no
C204 . C206 . N207 . 178.3(8)    no
